1                   **Extracellular vesicles secreted by *Brugia malayi* microfilariae**  
2                   **modulate the melanization pathway in the mosquito host**

3                   **Hannah J. Loghry<sup>1</sup>, Hyeogsun Kwon<sup>2</sup>, Ryan C Smith<sup>2</sup>, Noelle A Sondjaja<sup>1</sup>, Sarah J**  
4 **Minkler<sup>1</sup>, Sophie Young<sup>1</sup>, Nicolas J Wheeler<sup>3</sup>, Mostafa Zamanian<sup>3</sup>, Lyric C Bartholomay<sup>3</sup>,**  
5                   **Michael J Kimber<sup>1</sup>**

6                   <sup>1</sup>Department of Biomedical Sciences, College of Veterinary Medicine, Iowa State University,  
7                   Ames, Iowa, USA

8                   <sup>2</sup>Department of Entomology, College of Agriculture and Life Sciences, Iowa State University,  
9                   Ames, Iowa, USA

10                  <sup>3</sup>Department of Pathobiological Sciences, College of Veterinary Medicine, University of  
11                  Wisconsin-Madison, Madison, Wisconsin, USA

12

## 13 **Abstract**

14 Vector-borne, filarial nematode diseases represent a significant and affecting disease burden in  
15 humans, domestic animals, and livestock worldwide. Parasitic filarial nematodes require both an  
16 intermediate (vector) host and a definitive (mammalian) host during the course of their life cycle.  
17 In either host, the nematode must evade the host elicited immune response in order to develop  
18 and establish infection. There is direct evidence of parasite-derived immunomodulation in  
19 mammals, however, there is less evidence of parasite immunomodulation of the vector host. We  
20 have previously reported that all life stages of *Brugia malayi*, a causative agent of lymphatic  
21 filariasis, secrete extracellular vesicles (EVs). Here we investigate the immunomodulatory  
22 effects of microfilariae derived EVs on the vector host *Aedes aegypti*. RNA-seq analysis of an *A.*  
23 *aegypti* cell line treated with *B. malayi* microfilariae EVs showed differential expression of both  
24 mRNAs and miRNAs, some with roles in immune regulation. One downregulated gene,  
25 AAEL002590, identified as a serine protease, was shown to have direct involvement in the  
26 phenoloxidase (PO) cascade through analysis of PO activity. Similarly, injection of adult female  
27 mosquitoes with *B. malayi* microfilariae EVs validated these results *in vivo*, eliciting a  
28 downregulation of the AAEL002590 transcript and a significant reduction in PO activity. Our  
29 data indicates that parasite-derived EVs are capable of interfering with critical immune responses  
30 in the vector host, particularly immune responses such as melanization that target extracellular  
31 parasites. In addition, this data provides novel targets for transmission control strategies for LF  
32 and other parasitic diseases.

33

34

## 35 **Author Summary**

36 Vector-borne, filarial nematode diseases represent a significant and affecting disease burden in  
37 humans, domestic animals and livestock worldwide. Parasitic nematodes must evade the elicited  
38 immune response of their hosts in order to develop and establish infection. While there is  
39 evidence for immunomodulation of the mammalian host, the mechanism of this  
40 immunomodulation is not fully clear and there is limited evidence for immunomodulation of the  
41 vector host. Here we have shown that parasite-derived extracellular vesicles are effector  
42 structures for immunomodulation of the vector host. In particular, we have identified that  
43 parasite-derived extracellular vesicles can interfere with critical mosquito immune responses  
44 against parasites. This data provides insight into parasite biology and novel targets for  
45 transmission control strategies for parasitic diseases.

46

## 47 **1. Introduction**

48 Vector-borne, filarial nematode diseases represent a significant and affecting disease burden in  
49 humans, domestic animals, and livestock worldwide. In humans, Lymphatic Filariasis (LF) is  
50 caused by multiple species of filarial nematodes, including *Brugia malayi* and is endemic in 72  
51 countries with over 860 million people infected or at risk of infection (1). Adult parasites reside  
52 in the lymphatic vasculature and although often asymptomatic, infection can result in extreme  
53 morbidity including lymphangitis, lymphedema (primarily in the extremities), and secondary  
54 bacterial infection/dermatitis (2). Current control strategies rely on mass drug administration  
55 programs that utilize inadequate anthelmintic drugs that do not effectively kill adult parasites or  
56 resolve established infections. The need for new control strategies of filarial nematode diseases is

57 necessary, however, progress in developing effective treatments has been stalled by our lack of  
58 understanding of parasite biology and host-parasite interactions.

59 Parasitic filarial nematodes require both an intermediate (vector) host and a definitive  
60 (mammalian) host during the course of their life cycle. In either host, the nematode must evade  
61 the elicited immune response of the host in order to develop and establish infection. Various  
62 immune evasion strategies have been documented, including manipulation of host immune  
63 responses (3). In mammals, there is direct evidence of parasite-derived immunomodulation. It  
64 has been shown that parasites are capable of expanding regulatory immune cells (4–10), inducing  
65 apoptosis in type 1 immune response cell types (11–14), manipulating pattern recognition  
66 receptors (PRRs) (15–21), and increasing anti-inflammatory cytokines such as IL-4/IL-10 (22–  
67 24). However, there is less extensive evidence of parasite immunomodulation of the vector host.  
68 Early studies have shown that filarial nematode parasites can inhibit melanization (25).

69 Melanotic encapsulation, a crucial mosquito innate immune response to the microscopic larval  
70 stages of the parasite that infect mosquitoes, is a core arthropod defense mechanism that prevents  
71 infecting nematode growth and reproduction, and eventually leads to their death (26). Melanotic  
72 encapsulation involves both the humoral and cellular components of the innate immune response  
73 in mosquitoes. Upon recognition of a pathogen, the cellular arm of insect innate immunity drives  
74 aggregation of hemocytes to form a multicellular layer around the invading pathogen.

75 Concurrently, the humoral arm of insect innate immunity initiates melanin production in the  
76 hemocytes (27–35). This process is controlled by the phenoloxidase (PO) cascade, which is  
77 initiated when a pathogen associated molecular pattern (PAMP) binds to its pattern recognition  
78 receptor (PRR) to initiate a serine protease cascade. This cascade ultimately leads to the  
79 activation of a pro-phenoloxidase activating factor which in turn will activate phenoloxidase

80 (26,36,37). Phenoloxidase can then oxidize phenols to quinones which are further polymerized to  
81 melanin (38). Death of the parasite is believed to be due to nutrient deprivation, asphyxiation,  
82 and/or through the production of toxins such as quinones and other reactive oxygen species  
83 produced during melanin production (39,40).

84 The mechanistic basis for nematode manipulation of mosquito immune responses is not clear but  
85 recent studies exploring vector host global transcriptomic changes in response to parasite  
86 invasion have identified downregulation of immune-related genes during infection (41–43). A  
87 consensus view is that the cumulative effect of this modulation, be it within the intermediate or  
88 definitive host, is to suppress the host immune response towards a tolerant state in which the  
89 immune response is still present and active, but damage to the parasite is limited. While there is  
90 unequivocal evidence that parasites can directly modulate the host immune response, and  
91 although the concept is broadly accepted, the parasite-derived effectors that drive this  
92 modulation at the cellular and molecular level remain unclear and poorly understood, especially  
93 within the context of the vector host.

94 Parasite excretory-secretory products (ESP) are a well-established source of potential effector  
95 molecules. Parasite ESP encompass freely secreted proteins and nucleic acids, as well as  
96 extracellular vesicles (EVs), which are membrane-bound structures secreted by both prokaryotic  
97 and eukaryotic cells including filarial nematodes (15,44–47). They contain complex cargo that  
98 can include proteins, small RNA species, and lipids (48,49) and have been shown to be highly  
99 involved in cell-to-cell communication and have roles in various physiological processes (48,50–  
100 52). Although EVs are a newly recognized fraction of parasitic nematode ESP, the cargo of some  
101 nematode EVs have been profiled, revealing contents to include protein and small RNA species  
102 with predicted immunomodulatory properties (15,44,46,53–61). There is strong evidence that

103 these EVs have direct involvement in immunomodulation of mammalian hosts

104 (4,15,16,44,53,55,56,60,62,63).

105 We hypothesize that filarial nematode EVs secreted by infective stages of filarial parasites act as  
106 effectors to modulate the immune response of the vector host mosquito. To test this hypothesis,  
107 we examined the modulatory effects of *B. malayi* microfilariae (mf) EVs on the global  
108 transcriptomic profile of *Aedes aegypti* derived Aag2 cells, an established model for mosquito  
109 hemocytes due to their characterized immunocompetence (64). We found that nematode EV  
110 treatment drove differential expression of host genes, including a serine protease gene. This gene  
111 was shown to have direct involvement in the PO pathway as knockdown of the gene lead to a  
112 reduction in PO activity *in vitro*. The effect of microfilariae EVs was subsequently investigated  
113 *in vivo*, and it was found that these microfilariae derived EVs inhibited PO activity in adult  
114 female *A. aegypti*. These findings provide evidence that parasite derived extracellular vesicles  
115 contain cargo that are capable of modulating critical vector host immune responses.

116

## 117 **2. Results**

### 118 **2.1 *B. malayi* mf derived EVs are internalized by Aag2 cells**

119 To confirm that EVs were being isolated from spent media, EVs were imaged using TEM (Fig.  
120 1A). Particles isolated from spent media exhibited the classic exosome-like deflated soccer ball  
121 morphology under EM but such structures were absent from unconditioned media. Vesicle size  
122 was further validated with nanoparticle tracking analysis using NanoSight LM10 (Malvern  
123 Panalytical, Malvern UK)(Fig. 1B) and showed that the isolated EVs had a mean size and  
124 concentration of 92.2 nm and  $2.68 \times 10^9$  particles/ml respectively, well within the expected 50-

125 200nm range. To investigate the potential for parasitic excretory-secretory products to interact  
126 with vector host immune cells, we treated Aag2 cells, an immunocompetent *A. aegypti* cell line  
127 (64), with PKH67 stained *B. malayi* mf derived EVs. 24 hours after treatment, cells were  
128 additionally stained with DAPI and phalloidin, and imaged with confocal microscopy. Aag2 cells  
129 were shown to internalize *B. malayi* mf derived EVs as compared to control cells (Fig. 1C-D).  
130 EVs appeared in punctate areas within the cell and were not found diffused throughout the  
131 cytoplasm. This correlates with previous evidence that EVs are internalized via endocytosis and  
132 thus would be confined to endosomes within the cytoplasm (65). In addition, internalization of  
133 parasite EVs by murine epithelial cells showed a similar punctate appearance (15). However, a  
134 different phenotype was seen by parasite EVs internalized by murine macrophages and human  
135 monocytes where the EVs appeared diffused throughout the cytoplasm (44,46,53). These  
136 differences in internalization appearance may be due to various endocytosis pathways utilized by  
137 the various cell types. To begin to tease apart the endocytic mechanism by which mf EVs are  
138 being internalized, Aag2 cells were treated with the endocytosis inhibitors chlorpromazine (CPZ)  
139 and nystatin. CPZ is an inhibitor of clathrin-mediated endocytosis and has been shown to inhibit  
140 the function of a key clathrin-mediated endocytic adaptor protein AP2 (66,67). Nystatin is  
141 capable of binding cholesterol and thus can inhibit caveolin-mediated endocytosis (68). It was  
142 observed that chlorpromazine, but not nystatin inhibited the endocytosis of *B. malayi* mf EVs  
143 (Fig. 1E-F), suggesting that the mechanism of endocytosis of parasitic EVs is clathrin-mediated.  
144 EV internalization was quantified using flow cytometry (Supplemental Fig. 1). 51% of Aag2  
145 cells internalized *B. malayi* mf EVs as compared to untreated cells ( $p < 0.0001$ ,  $N = 3$ ).  
146 Treatment with the endocytosis inhibitor chlorpromazine reduced the number of Aag2 cells that  
147 internalized *B. malayi* mf EVs by 39% as compared to EV only treated cells ( $p = 0.0003$ ,  $N = 3$ ).

148 However, the endocytosis inhibitor nystatin did not significantly inhibit EV internalization as  
149 compared to EV only treated Aag2 cells.

150

## 151 **2.2 EV Treatment suppresses miRNA expression with Immune Related Targets**

152 Due to the immunomodulatory cargo identified in other *B. malayi* life stages (44,46), we  
153 hypothesized that Aag2 cell phenotypes would be modulated by treatment with *B. malayi* mf  
154 EVs. To simulate a naturally occurring infection, Aag2 cells were first treated with LPS  
155 (500ng/ml) to mimic the immune response that would initially occur during the early stages of  
156 infection. 12 hours later, the cells were then treated with either dPBS or *B. malayi* mf EVs to  
157 examine the modulatory effects of EV treatment on an established response. 16 hours later cells  
158 were collected and processed for miRNA sequencing. Of the 300 miRNAs identified, 196 were  
159 expressed in all three treatment groups (control, LPS only, and LPS + EV). The control treatment  
160 group shared 21 miRNAs with the LPS only treatment group and 12 with LPS + EV while LPS  
161 and LPS + EV shared 10 common miRNAs. The control, LPS and LPS + EV treatment groups  
162 had 40, 19 and two miRNAs that were unique to each treatment group, respectively (Fig 2A). To  
163 investigate the ability of *B. malayi* EVs to regulate an immune response, we compared miRNA  
164 expression between LPS and LPS + EV treatment groups. Six miRNAs were identified to be  
165 significantly downregulated in LPS+EV as compared to LPS only, including aae-mir-1175, aae-  
166 mir-2945, bmo-mir-6497, nlo-mir-275, aae-mir-184, and PC-5p-30141\_33 (Fig 2B). Target  
167 prediction was conducted on these differentially expressed miRNA followed by GO analysis of  
168 the predicted gene targets. Targets were identified for five out of the six downregulated miRNAs  
169 with gene targets of these downregulated miRNAs having roles in proteolysis, regulation of  
170 transcription, signal transduction, phagocytosis, and cell differentiation among others (Fig 2C).



171 Additionally, KEGG analysis identified that the predicted gene targets are involved in multiple  
172 immune related pathways (Table 1). Gene targets of the downregulated miRNAs are predicted to  
173 be involved in common insect immune signaling pathways such as Toll/IMD, MAPK, TGF $\beta$  and  
174 insulin signaling pathways among others. Some of the predicted gene targets include  
175 AAEL008634, a jnk protein; AAEL010433, a transcriptional co-repressor, AAEL003505; a jun  
176 protein; and AAEL013433, a spaetzle-like cytokine. One of these miRNAs, aae-mir-1175, is  
177 conserved in *Anopheles gambiae* and was shown to be downregulated in plasmodium infected  
178 mosquitoes as compared to non-infected mosquitoes (69). In addition, mir-1175 has been  
179 identified to be solely expressed in the mosquito midgut a critical barrier in parasite development  
180 and transmission in the vector host. A similar phenotype was seen in *A. aegypti* where aae-mir-  
181 1175 was downregulated in mosquitoes infected with dengue virus as compared to non-infected  
182 mosquitoes(70). This provides evidence for a conserved immunomodulation phenotype across  
183 diverse vector pathogens that enables pathogen migration and development. *A. aegypti* infected  
184 with *Wolbachia* showed a similar downregulation of aae-mir-2945 when compared to non-  
185 infected mosquitoes providing additional support for downregulation of miRNAs to drive  
186 immunomodulation. The direct role that downregulating these miRNAs have on insect immune  
187 cell responses remain unknown, but these data suggest that *B. malayi* EVs are capable of  
188 modulating post-transcriptional control of host gene expression, including genes potentially  
189 involved in mosquito immune signaling pathways. Additional experimentation needs to be  
190 conducted to determine what specific effector molecule in the EV cargo is driving this  
191 modulation.

192

193 **2.3 Microfilariae EVs downregulate predicted immune related genes *in vitro***

194 mRNA-seq analysis was conducted concurrently with miRNA-seq analysis. Many differentially  
195 expressed genes between LPS and LPS + EV treatment groups were identified (Fig. 3A). A  
196 majority of the most highly upregulated or downregulated genes were uncharacterized protein  
197 coding genes with unknown function. Thus, rather than focusing on these most differentially  
198 regulated targets, genes that were significantly differentially expressed but also moderately  
199 annotated were instead chosen for *in vitro* validation. For example, AAEL024490 is a predicted  
200 cys-loop ligand-gated ion channel (cysLGIC) subunit with high sequence identity to a predicted  
201 gamma-aminobutyric acid (GABA) gated chloride ion channel (CLIC) subunit (this subunit will  
202 be referred to as a CLIC subunit for simplicity). AAEL002590 is a putative serine protease that  
203 has a *Culex quinquefasciatus* ortholog that has been identified as a pro-phenoloxidase activating  
204 factor (PPAF). Both the CLIC subunit gene and the serine protease gene were significantly  
205 downregulated upon EV treatment by 99% ( $p < 0.0001$ ) and were among the genes chosen for  
206 *in vitro* validation using RT-qPCR. Aag2 cells were stimulated with LPS to elicit an immune  
207 response and then followed with treatment of serial dilutions of *B. malayi* mf EVs. The CLIC  
208 subunit was significantly downregulated, expression was reduced by 68% when treated with  
209  $1 \times 10^5$  EVs ( $p = 0.0369$ ,  $N = 3$ ) (Fig. 3B) as compared to LPS only treated cells. EV treatment  
210 suppressed CLIC expression to basal levels observed in non-LPS treated Aag2 cells (53% of LPS  
211 stimulated value,  $p = 0.0425$ ,  $N = 3$ ). The serine protease gene was also significantly  
212 downregulated after treatment with  $1 \times 10^5$  *B. malayi* mf EVs (57%,  $p = 0.0223$ ,  $N = 3$ ) (Fig. 3C).  
213 Again, EV treatment completely abrogated the LPS stimulation of expression ( $p = 0.0271$ ,  $N =$   
214 3). These findings are biologically relevant as  $1 \times 10^5$  EVs is within the range of anticipated EVs  
215 that would be present in a mosquito after a blood meal. While the number of mf taken up by a  
216 mosquito during a blood meal varies on the microfilariae density in the blood of the host, it has

217 been established that the approximate mean number of mf taken up by a mosquito is between 1-  
218 300 mf with most taking up approximately 40 mf (71–73). In addition, it has been shown that *B.*  
219 *malayi* mf secrete, on average, 4000 EVs per mf in 24 hours (47). These data provide the  
220 approximate range of EVs that would be present in a mosquito within 24 hours of a blood meal  
221 would be between  $1 \times 10^5$  –  $1 \times 10^6$ . Since AAEL002590 was identified as a serine protease with  
222 homology to a *C. quinquefasciatus* PPAF, we next wanted to investigate whether this gene was  
223 involved in the PO pathway. RNAi was used to knockdown AAEL002590 in Aag2 cells with a  
224 time course experiment showing that optimal knockdown occurred at 24 hrs post-RNAi  
225 treatment with 79% suppression of AAEL002590 expression ( $p = 0.0012$ ,  $N = 3$ ) (Supplemental  
226 Figure 3). To investigate whether AAEL002590 was involved in the PO pathway, Aag2 cells  
227 were treated with duplexed siRNA or scrambled siRNA as a negative control for 24 hrs.  
228 Following RNAi treatment cells were either treated with dPBS to quantify changes in basal PO  
229 activity or challenged with LPS (500ng/ml) for 6 or 24 hours after which cell culture supernatant  
230 was collected and mixed with L-DOPA for the PO activity assay. The assay was incubated  
231 overnight and basal PO activity was measured at 490nm. Basal PO activity was inhibited by 36%  
232 after AAEL002590 RNAi as compared to control cells at 6 hours ( $p = 0.0002$ ,  $N = 3$ ) and  
233 inhibited by 54% as compared to control at 24 hours ( $p = 0.018$ ,  $N = 3$ ) (Fig 3D). While LPS  
234 treatment has been used to induce an immune response in Aag2 cells previously (64) and was  
235 successful in inducing an immune response in Aag2 cells as evident by our gene expression  
236 experiments, LPS did not sufficiently induce the PO cascade *in vitro*. However, it is clear from  
237 RNAi-mediated knockdown of basal PO activity that AAEL002590, a target for parasite EV  
238 modulation, is involved in the host PO pathway.

239

240 GO enrichment analysis was conducted on all significantly ( $p \leq 0.05$ ) upregulated or  
241 downregulated mRNAs. We found that genes upregulated following EV treatment were enriched  
242 for GO terms associated with metabolic processes and oxidoreductase activity (Fig. 4A). Some  
243 increases in metabolic activity and increases in oxidoreductase activity can be explained by the  
244 vector's reaction to initial parasite infection. However, increases in steroid and lipid biosynthesis  
245 may be driven by parasite effector molecules. It has been shown that host steroid hormones can  
246 be influenced by development of parasites and dictate their course of infection, with increase  
247 production of steroid hormones leading to more rapid development and longer infections (74,75).  
248 In addition, it has been shown that host lipid biosynthesis is hijacked by parasites and is a  
249 common them in vector-borne diseases(76).

250

251 Genes that were downregulated after EV treatment were enriched for GO terms associated with  
252 signaling and immune responses (Fig. 4B). Signaling GO terms include ligand-gated ion channel  
253 activity, transmembrane ion transporter activity, neurotransmitter release and neurotransmitter  
254 secretion. As mentioned previously, we have already validated that a predicted GABA-gated  
255 chloride ion channel subunit is downregulated after EV treatment. The GABAergic system has  
256 been highly implicated in human immune functions including roles in phagocytosis, cytokine  
257 production, and cell proliferation(77). While the main findings in humans have concluded that  
258 the GABAergic system leads to immunosuppressive phenotypes, the possible role of GABA  
259 receptors in invertebrate immune responses has not been well studied. In insects, the cysLGIC  
260 superfamily is known for its inhibitory roles in neurotransmission and as target sites for  
261 insecticides(78). Dieldrin and endosulfan are organochlorine-based insecticides that function as  
262 GABA receptor antagonists and it has been shown that sub-lethal doses of both dieldrin and

263 endosulfan inhibited the encapsulation of *Leptopolina boulandi* eggs by *Drosophila* larvae(79).  
264 The strong body of evidence that GABA receptors are involved in mammalian neurohormonal  
265 immune regulation and that certain GABA receptor antagonists in insects can modulate  
266 encapsulation, suggests a potential role for the predicted GABA-gated chloride channel in  
267 neurohormonal regulation of mosquito immune responses. In particular, a role in promoting or  
268 driving the encapsulation process.

#### 269 **2.4 Phenoloxidase activity is inhibited by EV treatment**

270 Having established that parasite EV treatment modulates AAEL002590 in Aag2 cells *in vitro*, we  
271 next wanted to determine if this phenotype was recapitulated *in vivo*. Adult female mosquitoes  
272 were injected with LPS (1mg/ml) followed by injection with mf EVs or dPBS 6 hours later.  
273 Mosquitoes were incubated for 24 hours and then AAEL002590 expression was assayed by RT-  
274 qPCR. Injection with  $1 \times 10^5$  mf EVs significantly downregulated the serine protease gene by 84%  
275 ( $p = 0.02$ ,  $N = 3$ ) as compared to LPS only (Fig. 5A). This EV-suppression returned  
276 AAEL002590 expression to basal levels comparable to control mosquitoes in which  
277 AAEL002590 expression was 74% lower than LPS stimulated mosquitoes ( $p = 0.05$ ,  $N = 4$ ).  
278 Since we had already shown that knockdown of the serine protease gene in Aag2 cells inhibited  
279 PO activity *in vitro* we wanted to investigate if *B. malayi* mf EVs could inhibit PO activity *in*  
280 *vivo*. Adult female mosquitoes were treated as previously described and hemolymph was  
281 collected by perfusion following the 24-hour incubation. Hemolymph was then mixed with L-  
282 DOPA and PO activity was measured by optical density (OD) readings at 490nm every 5  
283 minutes for 30 minutes and a final reading at 60 minutes. PO activity was significantly inhibited  
284 in hemolymph from mosquitoes injected with  $1 \times 10^5$  mf EVs at all time points. Specifically, PO  
285 activity was inhibited by 65% ( $p < 0.05$ ), 81% ( $p < 0.0001$ ), 80% ( $p < 0.0001$ ), 78% ( $p <$

286 0.0001), 76% ( $p < 0.0001$ ), 74% ( $p < 0.0001$ ), 72% ( $p < 0.0001$ ), and 64% ( $p < 0.0001$ ) at 0, 5,  
287 10, 15, 20, 25, 30 and 60 minutes respectively (all  $N = 3$ ) as compared to LPS only treated  
288 mosquitoes. These results indicate that *B. malayi* mf EVs inhibit PO activity *in vivo* at  
289 biologically relevant concentrations. While the PO activity induced by LPS treatment may not  
290 have appeared as high as predicted, the pronounced inhibition after EV treatment is compelling.

291

### 292 **3. Discussion**

293 While there is strong evidence for parasite-derived host immunomodulation of the mammalian  
294 host, evidence of immunomodulation of the vector host is lacking. Here we have shown that  
295 parasite-derived extracellular vesicles (EVs) elicit transcriptional changes in an insect immune  
296 cell model, specifically, our data show that *B. malayi* mf derived EVs can modulate multiple  
297 genes involved in the humoral immune response. The humoral immune response of a mosquito is  
298 comprised of pattern recognition receptors (PRRs), antimicrobial peptides (AMPs) and  
299 components of the phenoloxidase (PO) cascade. Downregulation of genes involved in these  
300 immune responses would be advantageous for any invading pathogen, especially those that must  
301 migrate through the mosquito hemolymph. Melanotic encapsulation is a fundamental mosquito  
302 defense mechanism against parasites that involves the PO cascade and here we have identified a  
303 serine protease with homology to a known prophenoloxidase activating factor (PPAF) that is  
304 downregulated when mosquito cells are treated with *Brugia* EVs. Independent RNAi-mediated  
305 knockdown of this serine protease leads to an inhibition in PO activity in an insect cell line. We  
306 were also able to show that this phenotype is recapitulated during *Brugia* infection of mosquitoes  
307 *in vivo*. Further experimentation is needed to determine if this serine protease is indeed a true

308 PPAF or if it is a serine protease involved in an upstream cascade that activates pro-PPAF. In  
309 either case, however, our data provides evidence that parasite-derived EVs are effector structures  
310 in immunomodulation of vector hosts with the ability to interfere with critical host immune  
311 responses (Fig 6). Modulation of the vector host melanization immune response is logical as it is  
312 the main vector defense mechanism against large, extracellular pathogens such as parasitic  
313 nematodes. While our data provides novel mechanistic evidence for modulation of the host  
314 melanization immune response, this phenomenon seems to be central to parasite-vector host  
315 interactions. Christensen and LaFond (1986) were the first to provide evidence for parasite-  
316 derived modulation of the melanization response, showing that *B. pahangi* infected *A. aegypti*  
317 had reduced ability to melanize when challenged with intrathoracic inoculation of new *B.*  
318 *pahangi* mf (25). In addition, targeting of the melanization and encapsulation immune response  
319 is a common phenotype seen in infections of *Galleria mellonella* with the parasitic nematode  
320 *Steinernema carpocapsae*. Studies have shown that a trypsin-like serine protease secreted by *S.*  
321 *carpocapsae* can inhibit PO activity *in vitro* and affects the morphology of *S. carpocapsae*  
322 hemocytes and inhibits their ability to spread, a feature necessary for encapsulation (80). Further,  
323 a secreted chymotrypsin protease from *S. carpocapsae* has also been shown to inhibit PO activity  
324 and encapsulation of *G. mellonella* hemocytes both *in vitro* and *in vivo* (81). *Brugia* are known to  
325 actively secrete a number of proteases some of which may be involved in modulating the  
326 melanization response; indeed, a cathepsin L-like protease is abundantly found in the EVs of  
327 infective third stage larvae isolated from *A. aegypti* (44) that is essential to parasite survival  
328 within the mosquito (82). An important next step will be to characterize the cargo of *B. malayi*  
329 mf EVs to identify those effector molecules responsible for PO pathway downregulation. As this  
330 work continues, it will be essential to consider that the modulatory molecules may not be

331 proteins. We have shown that filarial nematode EVs also contain a diverse miRNA cargo (44)  
332 and secreted EVs represent a way that effector miRNAs can be released from the parasite and  
333 protected during trafficking to host cells, where they might downregulate immune pathways at  
334 the genetic level.

335 To this end, several transcriptomic studies have looked at the global transcriptional changes that  
336 occur in the mosquito host during parasite infection (41–43,83–85). Many of these studies also  
337 identified parasite-derived downregulation of mosquito host serine proteases at the genetic level.  
338 A study conducted on *B. malayi*-infected *Armigeres subalbatus* showed that there was a  
339 significant reduction in expression of multiple serine protease genes during the first 24 hours of  
340 infection (41). This correlates with the time frame that EV-secreting mf would be migrating from  
341 the midgut, through the hemocele and to the thoracic musculature, and the timeframe seen in our  
342 studies. While *B. malayi* do not effectively develop to infective L3 stage parasites in *A.*  
343 *subalbatus*, it still provides evidence for host transcriptional changes during early stages of  
344 infection. Similar trends were observed in *B. malayi* infected *A. aegypti* where there was  
345 evidence for parasite derived alteration in expression of genes involved in blood digestion and  
346 immune function including specific downregulation of serine protease genes (43), providing  
347 broad evidence for parasite immunomodulation in a compatible vector model. In addition, a  
348 study looking at transcriptional changes in both *B. malayi* and *A. aegypti* during the course of  
349 infection saw that between 2-4 days post infection, the *A. aegypti* serine protease gene,  
350 AAEL002590, was downregulated in infected mosquitoes (84). This downregulation occurring  
351 2-4 days post infection correlates with our study as 2 days post infection broadly aligns with the  
352 mf to L1 molt within the thoracic muscles but some mf will still be present (43). It is also  
353 important to note that while our data shows downregulation occurring as early as 24 hours post



354 treatment, this may be due to the fact that we are injecting isolated EVs and not infecting with  
355 live parasites. Many of these transcriptomic studies also identified downregulation of CLIP  
356 serine proteases or prophenoloxidase enzymes (43,83,85), key components involved in the  
357 prophenoloxidase cascade and melanization immune response, providing additional  
358 corroboration for our observation that *B. malayi* mf EVs are interfering with this immune  
359 response. While our study provides a mechanism for parasite-derived transcriptional changes of  
360 the host, all these transcriptional studies provide a substrate for further studies aimed at better  
361 understanding mosquito immune responses. Paying particular attention to those mosquito genes  
362 that filarial nematode parasites have been selected to suppress over millions of years of the host-  
363 parasite interaction may reveal the most critical pathways and proteins to exploit for insecticides  
364 or novel transmission control strategies.

365

366 **Figure 6. *B. malayi* microfilariae release EVs that interfere with the PO cascade and**  
367 **melanization**

368 Melanotic encapsulation is a common insect defense mechanism against parasites. Upon  
369 recognition of a parasite, hemocytes aggregate forming a multicellular layer that deposits a  
370 melanin-enriched capsule around the invading parasite. Melanin production is controlled by the  
371 phenoloxidase (PO) cascade, which through a series of interdependent reactions, leads to the  
372 activation of PO that oxidizes phenols to quinones, which are further polymerized to melanin.  
373 Death of the parasite is believed to be due to nutrient deprivation, asphyxiation, or through the  
374 production of toxins such as quinones and other reactive oxygen species produced during  
375 melanin production. *B. malayi* microfilariae-derived extracellular vesicles downregulate a serine

376 protease that functions either at the serine protease cascade or as a PPAF, either way interfering  
377 with the production of PO and thus inhibiting melanization of invading parasites.

378

379 There is a growing body of evidence that host immunomodulation by parasite-derived EVs is a  
380 common motif in parasitic nematode infections. This picture began to emerge with seminal work  
381 from Buck et al. (2014) who showed that EVs released by the murine gastrointestinal nematode,  
382 *Heligmosomoides polygyrus* suppressed expression of an IL-33 receptor subunit (also known as  
383 ST2) in intestinal epithelial cells (15,16). IL-33 is an alarmin cytokine that plays an important  
384 role in initiation of type 2 immune responses, is critical for driving induction of Th2-associated  
385 cytokines, and is involved in the expulsion of intestinal parasitic nematodes (86). This work was  
386 extended to show that the same EVs elicited similar modulatory phenotypes in macrophages  
387 (16). Further studies have shown that *Trichinella spiralis* EVs are capable of producing some of  
388 the modified type 2 immune response phenotypes seen in chronic infections. *T. spiralis* EVs  
389 have been shown to downregulate the pro-inflammatory cytokines IL-1 $\beta$ , TNF $\alpha$ , and IFN $\gamma$  while  
390 also increasing production of the anti-inflammatory cytokines IL-10 and TGF- $\beta$  in an induced  
391 colitis mouse model (4). Similarly, *Nippostrongylus brasiliensis* EVs were able to reduce IL-1 $\beta$   
392 and increase IL-10 expression in a similar induced colitis mouse model (55). Importantly, our  
393 group and others have shown that the modulation of host biology via EVs is not limited to  
394 gastrointestinal parasitic nematodes but also occurs at the filarial nematode-host interface. We  
395 have previously described how EVs released by infective L3 stage *B. malayi* drive a phenotype  
396 in murine macrophages that is more consistent with classical activation than alternative  
397 activation (44). More compelling, evidence generated by the Nutman laboratory shows that EVs  
398 secreted by *B. malayi* mfs inhibit phosphorylation of the mTOR complex in human monocytes

399 and point to these EVs as the critical parasite-derived factor eliciting Dendritic cell dysfunction  
400 during filarial disease (53). The data from these various studies collectively show parasite-  
401 derived EVs driving diverse but consistent effects in mammalian host, an observation that we  
402 now extend to the vector host.

403 Our understanding of the filarial nematode-vector interface is incomplete, but the data described  
404 in this paper helps to begin addressing this knowledge gap and may even seed the identification  
405 of novel targets that could contribute to better controlling filarial nematode diseases. Identifying  
406 targets at the vector stage of parasite development may stop transmission of the causative agents  
407 of filarial diseases and may provide insight into control strategies for other non-filarial, vector-  
408 borne diseases. Any mechanism that disrupts the vector-parasite interaction and skews the  
409 balance in favor of the vector is likely to prevent infection, parasite development and  
410 transmission.

411

## 412 **4. Materials and Methods**

### 413 **4.1 Cell culture**

414 The immunocompetent *Aedes aegypti*-derived Aag2 cell line was cultured in Schneider's  
415 *Drosophila* medium supplemented with 10% heat-inactivated, fetal bovine serum and 1%  
416 Penicillin/Streptomycin (all Thermo Fisher Scientific, Waltham, MA, USA) at 28°C.

### 417 **4.2 Parasite Culture and Maintenance**

418 *Brugia malayi* parasites were obtained from the NIH/NIAID Filariasis Research Reagent  
419 Resource Center (FR3) at the University of Georgia, USA. Persistent *B. malayi* infections at FR3

420 are maintained in domestic short-haired cats. Microfilariae stage *B. malayi* were obtained from a  
421 lavage of the peritoneal cavity of a euthanized gerbil. Microfilaria were washed according to  
422 FR3 protocols upon arrival at Iowa State University. Briefly, microfilariae were centrifuged at  
423 2000 rpm for 10 minutes at room temperature to pellet parasites. Transport media [RPMI with  
424 Penicillin (2000 U/ml) and Streptomycin (2000 µg/ml)] was aspirated and the parasite pellet  
425 resuspended in dPBS (Thermo Fisher Scientific). The parasite suspension was overlaid onto 10  
426 ml of Histopaque-1077 (Sigma Aldrich, St. Louis, MO, USA) and centrifuged at 2000 rpm for an  
427 additional 15 minutes. The supernatant was aspirated and parasite pellet washed with dPBS twice  
428 for 5 minutes each wash. After washing, the supernatant was aspirated and 3 ml of cell culture  
429 grade water (Cytiva, Marlborough, MA, USA) was added to the remaining pellet to lyse red  
430 blood cells (RBCs). Immediately following RBCs lysis, 10 ml dPBS was added and parasites  
431 centrifuged for an additional 5 minutes then washed one final time in dPBS. Microfilariae were  
432 then resuspended in worm culture media (RPMI with 1% 1 M HEPES, 1% 200mM L-glutamine,  
433 Penicillin (2000 U/ml), Streptomycin (2000 µg/ml), and 1% w/v glucose [all Thermo Fisher  
434 Scientific]) and cultured at 37°C with 5% CO<sub>2</sub> for 5-7 days. Parasite motility was used as an  
435 indicator of parasite viability. Parasite viability was checked daily and spent media was collected  
436 every 24 hours and retained for EV isolation as long parasites appeared viable.

### 437 **4.3 Mosquito Rearing**

438 *A. aegypti* (Liverpool strain) mosquitoes were reared at 27°C and 80% relative humidity with a  
439 14:10 h light/dark period. Larvae were fed a 50:50 diet of Tetramin ground fish flakes (Tetra,  
440 Melle, Germany) and milk bone dog biscuits. Adults were maintained on a 10% sucrose solution.  
441 All experimental techniques were performed on cohorts of 4–6 days old adult female  
442 mosquitoes.

#### 443 **4.4 EV Isolation, Quantification & Imaging**

444 EVs were isolated from spent culture media via differential ultracentrifugation as previously  
445 described (44,46,47). Briefly, media was filtered through 0.2 µm PVDF filtered syringes (GE  
446 Healthcare, Chicago, IL, USA) and centrifuged at 120,000 x g for 90 minutes at 4°C. The  
447 supernatant was decanted leaving approximately 1.5 ml media to ensure that the EV pellet was  
448 not disrupted. The retained media and pellet were filtered through a PVDF 0.2 µm syringe filter  
449 and centrifuged at 186,000 x g for a further 2 h at 4°C. The size profile and concentration of EVs  
450 in the isolated sample were quantified using nanoparticle tracking analysis (NTA; NanoSight  
451 LM10, Malvern Instruments, Malvern, UK). EV integrity and morphology were confirmed using  
452 transmission electron microscopy (TEM). Briefly, a 2 µl aliquot of EV preparation was placed  
453 onto a carbon film grid (Electron Microscopy Sciences, Hatfield, PA, USA) for 1 minute. The  
454 drop was wicked to a thin film and 2 µl of uranyl acetate (2% w/v final concentration) was  
455 immediately applied for 30 seconds, wicked, and allowed to dry. Images were taken using a  
456 200kV JEOL 2100 scanning and transmission electron microscope (Japan Electron Optics  
457 Laboratories, LLC, Peabody, MA) with a Gatan OneView camera (Gatan, Inc. Pleasanton, CA).

#### 458 **4.5 EV internalization by Aag2 cells**

459 Methods were based on protocols previously described (46), but modified for optimal imaging of  
460 the Aag2 cell line.  $3 \times 10^5$  Aag2 cells were seeded on an 18 mm, #1 thickness, poly-D-lysine  
461 coverslip (Neuvitro, Vancouver, WA) in a 12-well plate (Thermo Fisher Scientific) and cultured  
462 at 28°C overnight. Between  $5 \times 10^8$ - $1 \times 10^9$  isolated EVs were stained with PKH67 (Sigma Aldrich,  
463 St. Louis, MO) according to manufacturer's instructions. Confluent Aag2 cells were treated with  
464  $3.5 \times 10^7$  stained EVs and incubated for 24 hrs at 28°C. EV uptake was visualized with  
465 immunocytochemistry. Media was removed and cells were washed with 1X dPBS and fixed in

466 4% paraformaldehyde (Electron Microscopy Sciences) for 15 minutes at room temperature.  
467 Following three 1X dPBS washes at room temperature, cells were incubated with 1:300 Alexa  
468 Fluor 647 phalloidin (Thermo Fisher Scientific) for 45 minutes at room temperature followed by  
469 three washes of 1x dPBS for 5 minutes each. Cells were incubated with 300 nM DAPI (Thermo  
470 Fisher Scientific) for 5 minutes at room temperature followed by two washes in 1X dPBS.  
471 Coverslips were mounted using Fluoromount aqueous mounting media (Sigma Aldrich) and  
472 visualized by a Leica SP5 X MP confocal/multiphoton microscope system (Leica Microsystems  
473 Inc., Buffalo Grove, IL, USA).

474 Concurrently, EV internalization was quantified using flow cytometry.  $3 \times 10^5$  cells were seeded  
475 per well of a 12-well plate and incubated at 28°C overnight. Cells were incubated with  $3.5 \times 10^7$   
476 PKH67 stained EVs for 24 hrs at 28°C. Cells were washed in 1x dPBS and collected into  
477 polystyrene FACS tubes (Thermo Fisher Scientific). Cells were fixed in 4% paraformaldehyde  
478 for 20 minutes and washed with FACS buffer (dPBS supplemented with 1% BSA and 0.1%  
479  $\text{NaN}_3$ ). Cells were resuspended in 400  $\mu\text{l}$  FACS buffer and analyzed with a BD Accuri C6 Flow  
480 Cytometer (BD Biosciences, San Jose, CA). For endocytosis inhibition assays, Aag2 cells were  
481 treated with a final concentration of either 30  $\mu\text{M}$  chlorpromazine or 15  $\mu\text{M}$  nystatin (Thermo  
482 Fisher Scientific). Following a two-hour incubation, media was changed and cells treated with  
483  $3.5 \times 10^7$  *B. malayi* mf EVs, incubated for 24 hours and then collected for confocal microscopy  
484 and flow cytometry as described above.

#### 485 **4.6 mRNA-Seq Analysis**

486  $1 \times 10^5$  Aag2 cells were seeded in each well of a 96-well plate (Corning Inc, Corning, NY, USA)  
487 and incubated overnight at 28°C. The following day, culture media was changed and cells were  
488 treated with either lipopolysaccharide (LPS) (500 ng/ml) to stimulate an immune response *in*

489 *vitro* or dPBS as a negative control. Cells were incubated for an additional 12 hours at 28°C after  
490 which, culture media was changed and cells treated with  $1.1 \times 10^9$  parasite EVs per well. Cells  
491 were then incubated for a further 16 hours at 28°C before collection and storage in Trizol  
492 (Thermo Fisher Scientific) ahead of RNA extraction. Briefly, cells in Trizol were mixed with  
493 chloroform (0.2 ml chloroform per ml Trizol) and shaken vigorously for 20 seconds. Samples  
494 were allowed to sit at room temperature for 3 minutes and then centrifuged at  $10,000 \times g$  for 18  
495 minutes at 4°C. The aqueous phase was collected, and an equal volume of 100% ethanol was  
496 added. RNA was then purified and collected using a RNeasy Mini Kit (Qiagen, Hilden,  
497 Germany) according to manufacturer's instructions.

498 mRNA-seq was performed by LC Sciences (Houston, TX). Total RNA quantity and purity were  
499 analyzed using an RNA 6000 Nano LabChip Kit and a Bioanalyzer 2100 (Agilent, Santa Clara,  
500 CA). High quality RNA samples with RIN number  $> 7$  were used to construct the sequencing  
501 library. mRNA was purified from total RNA (5µg) using Dynabeads Oligo (dT)(Thermo Fisher  
502 Scientific) with two rounds of purification. Following purification, mRNA was fragmented into  
503 short fragments using a NEB Next Magnesium RNA Fragmentation Module (New England  
504 Biolabs, Ipswich, MA, USA) at 94°C for 5-7 minutes. Cleaved RNA fragments were reverse  
505 transcribed to cDNA by Superscript II Reverse Transcriptase (Thermo Fisher Scientific) and the  
506 resulting cDNA used to generate U-labeled second-stranded DNA using *E. coli* DNA  
507 polymerase I, RNase H (both New England Biolabs) and dUTP Solution (Thermo Fisher  
508 Scientific). An A-base was added to the blunt ends of each strand, preparing them for ligation to  
509 the indexed adapters. Each adapter contained a T-base overhang for ligating the adapter to the A-  
510 tailed fragmented DNA. Dual-index adapters were ligated to the fragments, and size selection  
511 was performed with AMPureXP beads (Beckman Coulter, Brea, CA, USA). U-labeled second-

512 stranded DNAs were treated with heat-labile UDG enzyme (New England Biolabs), and ligated  
513 products were amplified with PCR by the following conditions: initial denaturation at 95°C for 3  
514 minutes; 8 cycles of denaturation at 98°C for 15 seconds, annealing at 60°C for 15 seconds, and  
515 extension at 72°C for 30 seconds; and final extension at 72°C for 5 minutes. The average insert  
516 size for the paired-end libraries was 300 bp ( $\pm 50$  bp). Paired-end sequencing was performed on  
517 an Illumina HiSeq 4000 (Illumina, San Diego, CA, USA). Reads were adapter and quality  
518 trimmed using Trimmomatic (87). HISAT2 (88) and StringTie (89) were used to align surviving  
519 reads to the *B. malayi* reference genome (WormBase ParaSite version 12.4) (90,91) and to the *A.*  
520 *aegypti* reference genome (VectorBase release 47) (92) to produce raw counts for annotated  
521 genes. The RNA-seq pipeline was implemented using Nextflow (93). DESeq2 (94) and custom R  
522 scripts were used to identify differentially expressed genes (DEGs) across conditions. The R  
523 package topGO (95) was used to assess functional enrichment of differentially expressed genes.  
524 Gene ontology (GO) terms from the *A. aegypti* LVP transcriptome were retrieved from  
525 VectorBase (92).

#### 526 **4.7 miRNA-Seq Analysis**

527 microRNA (miRNA) sequencing was performed by LC Sciences. The total RNA quality and  
528 quantity were analyzed by Bioanalyzer 2100 (Agilent Technologies, Santa Clara, CA) with RIN  
529 number  $>7.0$ . Small RNA libraries were prepared using 1  $\mu$ g of total RNA and the TruSeq Small  
530 RNA Sample Prep Kits (Illumina) according to manufacturer's instructions. Single-end  
531 sequencing was performed on an Illumina HiSeq 2500 (Illumina) according to manufacturer's  
532 instructions. Raw reads were subjected to an in-house program, ACGT101-miR (LC Sciences),  
533 to remove adapter dimers and junk, low complexity and common non-target RNA families  
534 (rRNA, tRNA, snRNA, snoRNA) and repeats. Remaining unique sequences with length 18~26



535 nucleotides were mapped to specific species precursors in miRBase 22.0 (96–101) and by  
536 BLAST search (102) to identify known miRNAs and novel 3p- and 5p- derived miRNAs with  
537 their genomic location. Length variation at both 3' and 5' ends and one mismatch inside of the  
538 sequence were allowed in the alignment. The unique sequences mapping to specific species  
539 mature miRNAs in hairpin arms were identified as known miRNAs. The unique sequences  
540 mapping to the other arm of known specific species precursor hairpin opposite to the annotated  
541 mature miRNA-containing arm were considered to be novel 5p- or 3p derived miRNA  
542 candidates. Hairpin RNA structures of unmapped sequences were predicted from the flanking 80  
543 nucleotide sequences using RNAfold (103). The criteria for secondary structure prediction  
544 included number of nucleotides in one bulge in stem ( $\leq 12$ ), number of base pairs in the stem  
545 region of the predicted hairpin ( $\geq 16$ ), cutoff of free energy (kCal/mol  $\leq -15$ ), length of hairpin (up  
546 and down stems + terminal loop  $\geq 50$ ), length of hairpin loop ( $\leq 20$ ), number of nucleotides in one  
547 bulge in mature region ( $\leq 8$ ), number of biased errors in one bulge in mature region ( $\leq 4$ ), number  
548 of biased bulges in mature region ( $\leq 2$ ), number of errors in mature region ( $\leq 7$ ), number of base  
549 pairs in the mature region of the predicted hairpin ( $\geq 12$ ) and percent of mature sequences in stem  
550 ( $\geq 80$ ). To predict the genes targeted by most abundant miRNAs, two computational target  
551 prediction algorithms TargetScan (104–106) and Miranda 3.3a (107) were used to identify  
552 putative miRNA binding sites. Finally, the data predicted by both algorithms were combined and  
553 the overlaps calculated. The R package, enrichplot, was used to visualize GO term enrichment  
554 from the predicted targets of differentially expressed miRNAs.

#### 555 **4.8 RT-qPCR Validation of Gene Expression Levels**

556  $1 \times 10^5$  Aag2 cells were seeded in each well of a 96-well plate (Corning Inc, Corning, NY, USA)  
557 and incubated overnight at 28°C. The following day, culture media was changed and cells were

558 treated with either LPS (500 ng/ml) to stimulate an immune response *in vitro* or dPBS as a  
559 negative control. Cells were incubated for an additional 12 hours at 28°C after which, culture  
560 media was changed and cells treated with 10-fold serial dilutions ranging from  $1 \times 10^9$  to  $1 \times 10^2$   
561 parasite EVs. This range was used as it allowed us to see the effects of treating cells with more  
562 EVs than would be present in a natural infection, EV levels present during a natural infection ( $1$   
563  $\times 10^6$  –  $1 \times 10^5$ ) and the effects of having less EVs than would occur in a natural infection. Cells  
564 were then incubated for a further 16 hours at 28°C before collection and storage in Trizol  
565 (Thermo Fisher Scientific) ahead of RNA extraction described above. cDNA was synthesized  
566 from sample RNA using Superscript III First-Strand cDNA Synthesis kit (Thermo Fisher  
567 Scientific) according to manufacturer's instructions. 20 ng of cDNA was used per qPCR reaction  
568 using Powerup SYBR green master mix (Thermo Fisher Scientific) and gene specific primers  
569 according to manufacturer's instructions on a Quantstudio 3 Real-Time PCR system (Thermo  
570 Fisher Scientific). CT values were averaged across technical replicates and normalized against  
571 RPS17. Primer sequences for AAEL002590 (Serine Protease), AAEL024490 (predicted cys-loop  
572 ligand-gated ion channel [cysLGIC] subunit), and the housekeeping gene (RPS17) can be found  
573 in Supplemental Table 1.

#### 574 **4.9 *In vitro* RNA Interference**

575 Duplexed siRNA was designed and produced targeting the serine protease gene by Integrated  
576 DNA Technologies (Coralville, IA, USA). Sequences for the duplexed siRNA can be found in  
577 Supplemental Information 3.  $4 \times 10^4$  Aag2 cells were seeded per well of a 96-well plate and  
578 incubated overnight. 5 pmol of siRNA or scrambled negative control was mixed with  
579 lipofectamine RNAiMAX Reagent (Thermo fisher Scientific) to create a 1 pmol siRNA solution.  
580 10  $\mu$ l of the 1 pmol siRNA solution was added per well and incubated for 24 hours. To determine

581 RNAi efficiency, total RNA was isolated from cells for subsequent RT-qPCR as described  
582 above.

#### 583 **4.10 *Aedes aegypti* Injections**

584 Four to five-day old *A. aegypti* (Liverpool strain) female mosquitoes were intrathoracically  
585 injected with 69 nl of LPS (1 mg/ml) [Sigma Aldrich] or dPBS (Thermo Fisher Scientific) using  
586 a Nanoject III injector (Drummond Scientific Company, Broomall, PA, USA) and incubated for  
587 six hours at 27°C prior to EV injection. Mosquitoes were then challenged with serial dilutions of  
588  $1 \times 10^7$ ,  $1 \times 10^6$ ,  $1 \times 10^5$  EVs, or dPBS as a control. Total RNA was isolated from 8 mosquitoes per  
589 treatment group 24 hours post-challenge. Mosquitoes were homogenized using a mortar and  
590 pestle in 1 ml of Trizol. The resulting suspension was centrifuged at 12,000 x g for 10 minutes at  
591 4°C to remove debris, the supernatant collected. RNA extraction, cDNA synthesis and qPCR  
592 were performed as previously described.

#### 593 **4.11 Phenoloxidase Activity Assay**

594 Pooled hemolymph was collected from 10 adult female mosquitoes by perfusion and prepared  
595 for PO assay as previously described (108). Briefly, 10  $\mu$ l of hemolymph was mixed with 90  $\mu$ l  
596 of 3, 4-Dihydroxy-L-phenylalanine (L-DOPA, 4 mg/ml)(Sigma Aldrich) dissolved in nuclease  
597 free water (Cytiva). After an initial 10 minutes incubation at room temperature, PO activity was  
598 measured at 490 nm every 5 minutes for 30 minutes, then the final activity was measured at 60  
599 minutes using a Synergy HTX Multi-Mode Microplate Reader (Agilent). To determine if  
600 AAEL002590 was directly involved in the PO pathway AAEL002590 was knockdown via  
601 siRNA in Aag2 cells as previously described. After the 24 hr incubation, Aag2 cells were  
602 challenged with LPS (500ng/ml) for either 6 or 24 hours. 10  $\mu$ l of either control or siRNA treated

603 Aag2 cell culture media was mixed with 90  $\mu$ l L-DOPA as previously described. PO activity was  
604 allowed to proceed at room temperature overnight after which PO activity was measured at 490  
605 nm.

#### 606 **4.12 Statistical Analysis**

607 *In vitro* RT-qPCR validation was analyzed using a repeated measures one-way ANOVA while  
608 *in vivo* RT-qPCR validation was analyzed using mixed effects one-way ANOVA. Multiple  
609 comparisons were conducted using the Dunnett statistical hypothesis testing method. Enrichment  
610 of functions within the molecular function, biological process, and cellular component GO term  
611 sub-ontologies were analyzed using a Fisher's exact test. *In vivo* PO assays were analyzed using  
612 a repeated measures two-way ANOVA with a Šidák multiple comparisons test while *in vitro* PO  
613 assays were analyzed with multiple T tests with a Holm-Šidák multiple comparison test. For all  
614 significance testing p-values < 0.05 was considered significant. All ANOVAs were completed  
615 using GraphPad prism 9.3.1 (GraphPad Software, San Diego, CA, USA).

616

#### 617 **References**

- 618 1. World Health Organization. Global programme to eliminate lymphatic filariasis: progress report,  
619 2020 [Internet]. 2021 Oct [cited 2022 Feb 22] p. 12. Available from:  
620 <https://www.who.int/publications-detail-redirect/who-wer9641-497-508>
- 621 2. WHO. Lymphatic filariasis [Internet]. World Health Organization. [cited 2022 Jan 20]. Available  
622 from: <https://www.who.int/news-room/fact-sheets/detail/lymphatic-filariasis>
- 623 3. Castillo JC, Reynolds SE, Eleftherianos I. Insect immune responses to nematode parasites. Trends in  
624 Parasitology. 2011 Dec 1;27(12):537–47.
- 625 4. Yang Y, Liu L, Liu X, Zhang Y, Shi H, Jia W, et al. Extracellular Vesicles Derived From *Trichinella*  
626 *spiralis* Muscle Larvae Ameliorate TNBS-Induced Colitis in Mice. Frontiers in Immunology  
627 [Internet]. 2020 [cited 2022 Jan 24];11. Available from:  
628 <https://www.frontiersin.org/article/10.3389/fimmu.2020.01174>

- 629 5. Finlay CM, Walsh KP, Mills KHG. Induction of regulatory cells by helminth parasites: exploitation  
630 for the treatment of inflammatory diseases. *Immunological Reviews*. 2014;259(1):206–30.
- 631 6. Taylor MD, LeGoff L, Harris A, Malone E, Allen JE, Maizels RM. Removal of Regulatory T Cell Activity  
632 Reverses Hyporesponsiveness and Leads to Filarial Parasite Clearance In Vivo. *The Journal of*  
633 *Immunology*. 2005 Apr 15;174(8):4924–33.
- 634 7. Taylor MD, van der Werf N, Harris A, Graham AL, Bain O, Allen JE, et al. Early recruitment of  
635 natural CD4+Foxp3+ Treg cells by infective larvae determines the outcome of filarial infection.  
636 *European Journal of Immunology*. 2009;39(1):192–206.
- 637 8. KORTEN S, HOERAUF A, KAIFI JT, BÜTTNER DW. Low levels of transforming growth factor-beta  
638 (TGF-beta) and reduced suppression of Th2-mediated inflammation in hyperreactive human  
639 onchocerciasis. *Parasitology*. 2011 Jan;138(1):35–45.
- 640 9. D’Elia R, Behnke JM, Bradley JE, Else KJ. REGULATORY T CELLS. *J Immunol*. 2009 Feb  
641 15;182(4):2340–8.
- 642 10. Grainger JR, Smith KA, Hewitson JP, McSorley HJ, Harcus Y, Filbey KJ, et al. Helminth secretions  
643 induce de novo T cell Foxp3 expression and regulatory function through the TGF- $\beta$  pathway.  
644 *Journal of Experimental Medicine*. 2010 Sep 27;207(11):2331–41.
- 645 11. Harnett W, Harnett MM. Lymphocyte hyporesponsiveness during filarial nematode infection.  
646 *Parasite Immunology*. 2008;30(9):447–53.
- 647 12. Hartmann S, Kyewski B, Sonnenburg B, Lucius R. A filarial cysteine protease inhibitor down-  
648 regulates T cell proliferation and enhances interleukin-10 production. *European Journal of*  
649 *Immunology*. 1997;27(9):2253–60.
- 650 13. Jenson JS, O’Connor R, Osborne J, Devaney E. Infection with *Brugia microfilariae* induces apoptosis  
651 of CD4+ T lymphocytes: a mechanism of immune unresponsiveness in filariasis. *European Journal*  
652 *of Immunology*. 2002;32(3):858–67.
- 653 14. Mishra R, Panda SK, Sahoo PK, Bal MS, Satapathy AK. Increased Fas ligand expression of peripheral  
654 B-1 cells correlated with CD4+ T-cell apoptosis in filarial-infected patients. *Parasite Immunology*.  
655 2017;39(4):e12421.
- 656 15. Buck AH, Coakley G, Simbari F, McSorley HJ, Quintana JF, Le Bihan T, et al. Exosomes secreted by  
657 nematode parasites transfer small RNAs to mammalian cells and modulate innate immunity.  
658 *Nature Communications*. 2014 Nov 25;5(1):5488.
- 659 16. Coakley G, McCaskill JL, Borger JG, Simbari F, Robertson E, Millar M, et al. Extracellular Vesicles  
660 from a Helminth Parasite Suppress Macrophage Activation and Constitute an Effective Vaccine for  
661 Protective Immunity. *Cell Reports*. 2017 May 23;19(8):1545–57.
- 662 17. Semnani RT, Venugopal PG, Leifer CA, Mostböck S, Sabzevari H, Nutman TB. Inhibition of TLR3 and  
663 TLR4 function and expression in human dendritic cells by helminth parasites. *Blood*. 2008 Aug  
664 15;112(4):1290–8.

- 665 18. Babu S, Bhat SQ, Kumar NP, Lipira AB, Kumar S, Karthik C, et al. Filarial Lymphedema Is  
666 Characterized by Antigen-Specific Th1 and Th17 Proinflammatory Responses and a Lack of  
667 Regulatory T Cells. *PLOS Neglected Tropical Diseases*. 2009 Apr 21;3(4):e420.
- 668 19. Melendez AJ, Harnett MM, Pushparaj PN, Wong WSF, Tay HK, McSharry CP, et al. Inhibition of Fc  
669 epsilon RI-mediated mast cell responses by ES-62, a product of parasitic filarial nematodes. *Nat*  
670 *Med*. 2007 Nov 1;13(11):1375–81.
- 671 20. Ottow MK, Klaver EJ, van der Pouw Kraan TCTM, Heijnen PD, Laan LC, Kringel H, et al. The helminth  
672 *Trichuris suis* suppresses TLR4-induced inflammatory responses in human macrophages. *Genes*  
673 *Immun*. 2014 Oct;15(7):477–86.
- 674 21. Pineda MA, McGrath MA, Smith PC, Al-Riyami L, Rzepecka J, Gracie JA, et al. The parasitic helminth  
675 product ES-62 suppresses pathogenesis in collagen-induced arthritis by targeting the interleukin-  
676 17-producing cellular network at multiple sites. *Arthritis & Rheumatism*. 2012;64(10):3168–78.
- 677 22. King CL, Mahanty S, Kumaraswami V, Abrams JS, Regunathan J, Jayaraman K, et al. Cytokine  
678 control of parasite-specific anergy in human lymphatic filariasis. Preferential induction of a  
679 regulatory T helper type 2 lymphocyte subset. *J Clin Invest*. 1993 Oct;92(4):1667–73.
- 680 23. Nutman TB, Kumaraswami V. Regulation of the immune response in lymphatic filariasis:  
681 perspectives on acute and chronic infection with *Wuchereria bancrofti* in South India. *Parasite*  
682 *Immunology*. 2001;23(7):389–99.
- 683 24. Mangan NE, Fallon RE, Smith P, Rooijen N van, McKenzie AN, Fallon PG. Helminth Infection  
684 Protects Mice from Anaphylaxis via IL-10-Producing B Cells. *The Journal of Immunology*. 2004 Nov  
685 15;173(10):6346–56.
- 686 25. Christensen BM, LaFond MM. Parasite-Induced Suppression of the Immune Response in *Aedes*  
687 *aegypti* by *Brugia pahangi*. *The Journal of Parasitology*. 1986;72(2):216–9.
- 688 26. González-Santoyo I, Córdoba-Aguilar A. Phenoloxidase: a key component of the insect immune  
689 system. *Entomologia Experimentalis et Applicata*. 2012;142(1):1–16.
- 690 27. Andreadis TG, Hall DW. *Neoplectana carpocapsae*: Encapsulation in *Aedes aegypti* and changes in  
691 host hemocytes and hemolymph proteins. *Experimental Parasitology*. 1976 Apr 1;39(2):252–61.
- 692 28. Drif L, Brehélin M. The circulating hemocytes of *Culex pipiens* and *Aedes aegypti*: Cytology  
693 histochemistry, hemograms and functions. *Developmental & Comparative Immunology*. 1983 Sep  
694 1;7(4):687–90.
- 695 29. Beerntsen BT, Luckhart S, Christensen BM. *Brugia malayi* and *Brugia pahangi*: Inherent Difference  
696 in Immune Activation in the Mosquitoes *Armigeres subalbatus* and *Aedes aegypti*. *The Journal of*  
697 *Parasitology*. 1989;75(1):76–81.
- 698 30. Beerntsen BT, Severson DW, Christensen BM. *Aedes aegypti*: Characterization of a Hemolymph  
699 Polypeptide Expressed during Melanotic Encapsulation of Filarial Worms. *Experimental*  
700 *Parasitology*. 1994 Nov 1;79(3):312–21.

- 701 31. Paskewitz S, Riehle MA. Response of Plasmodium refractory and susceptible strains of Anopheles  
702 gambiae to inoculated Sephadex beads. *Developmental & Comparative Immunology*. 1994 Sep  
703 1;18(5):369–75.
- 704 32. Cupp MS, Chen Y, Cupp EW. Cellular Hemolymph Response of Simulium vittatum (Diptera:  
705 Simuliidae) to Intrathoracic Injection of Onchocerca lienalis (Filarioidea: Onchocercidae)  
706 Microfilariae. *Journal of Medical Entomology*. 1997 Jan 1;34(1):56–63.
- 707 33. Gorman MJ, Paskewitz SM. A Genetic Study of a Melanization Response to Sephadex Beads in  
708 Plasmodium-Refractory and -Susceptible Strains of Anopheles gambiae. *The American Journal of*  
709 *Tropical Medicine and Hygiene*. 1997 Apr 1;56(4):446–51.
- 710 34. Chen CC, Laurence BR. An ultrastructural study on the encapsulation of microfilariae of Brugia  
711 pahangi in the haemocoel of Anopheles quadrimaculatus. *International Journal for Parasitology*.  
712 1985 Aug 1;15(4):421–8.
- 713 35. Chikilian ML, Bradley TJ, Nayar JK, Knight JW. Ultrastructural comparison of extracellular and  
714 intracellular encapsulation of Brugia malayi in Anopheles quadrimaculatus. *J Parasitol*. 1994  
715 Feb;80(1):133–40.
- 716 36. Cerenius L, Söderhäll K. The prophenoloxidase-activating system in invertebrates. *Immunological*  
717 *Reviews*. 2004;198(1):116–26.
- 718 37. Nakhleh J, El Moussawi L, Osta MA. Chapter Three - The Melanization Response in Insect  
719 Immunity. In: Ligoxygakis P, editor. *Advances in Insect Physiology* [Internet]. Academic Press; 2017  
720 [cited 2022 Jan 20]. p. 83–109. (Insect Immunity; vol. 52). Available from:  
721 <https://www.sciencedirect.com/science/article/pii/S0065280616300467>
- 722 38. Nappi AJ, Vass E. Melanogenesis and the Generation of Cytotoxic Molecules During Insect Cellular  
723 Immune Reactions. *Pigment Cell Research*. 1993;6(3):117–26.
- 724 39. Kumar A, Srivastava P, Sirisena P, Dubey SK, Kumar R, Shrinet J, et al. Mosquito Innate Immunity.  
725 *Insects* [Internet]. 2018 Aug 8 [cited 2021 Jan 20];9(3). Available from:  
726 <https://www.ncbi.nlm.nih.gov/pmc/articles/PMC6165528/>
- 727 40. Lavine MD, Strand MR. Insect hemocytes and their role in immunity. *Insect Biochemistry and*  
728 *Molecular Biology*. 2002 Oct 1;32(10):1295–309.
- 729 41. Aliota MT, Fuchs JF, Mayhew GF, Chen C-C, Christensen BM. Mosquito transcriptome changes and  
730 filarial worm resistance in Armigeres subalbatius. *BMC Genomics*. 2007 Dec 18;8:463.
- 731 42. Bartholomay LC, Waterhouse RM, Mayhew GF, Campbell CL, Michel K, Zou Z, et al. Pathogenomics  
732 of Culex quinquefasciatus and meta-analysis of infection responses to diverse pathogens. *Science*.  
733 2010 Oct 1;330(6000):88–90.
- 734 43. Erickson SM, Xi Z, Mayhew GF, Ramirez JL, Aliota MT, Christensen BM, et al. Mosquito Infection  
735 Responses to Developing Filarial Worms. *PLOS Neglected Tropical Diseases*. 2009 Oct  
736 13;3(10):e529.

- 737 44. Zamanian M, Fraser LM, Agbedanu PN, Harischandra H, Moorhead AR, Day TA, et al. Release of  
738 Small RNA-containing Exosome-like Vesicles from the Human Filarial Parasite *Brugia malayi*. *PLoS*  
739 *Negl Trop Dis* [Internet]. 2015 Sep 24 [cited 2020 Mar 30];9(9). Available from:  
740 <https://www.ncbi.nlm.nih.gov/pmc/articles/PMC4581865/>
- 741 45. Tritten L, Clarke D, Timmins S, McTier T, Geary TG. *Dirofilaria immitis* exhibits sex- and stage-  
742 specific differences in excretory/secretory miRNA and protein profiles. *Veterinary Parasitology*.  
743 2016 Dec 15;232:1–7.
- 744 46. Harischandra H, Yuan W, Loghry HJ, Zamanian M, Kimber MJ. Profiling extracellular vesicle release  
745 by the filarial nematode *Brugia malayi* reveals sex-specific differences in cargo and a sensitivity to  
746 ivermectin. *PLOS Neglected Tropical Diseases*. 2018 Apr 16;12(4):e0006438.
- 747 47. Loghry HJ, Yuan W, Zamanian M, Wheeler NJ, Day TA, Kimber MJ. Ivermectin inhibits extracellular  
748 vesicle secretion from parasitic nematodes. *Journal of Extracellular Vesicles*. 2020;10(2):e12036.
- 749 48. Thery C, Zitvogel L, Amigorena S. Exosomes: composition, biogenesis and function. *Nature Reviews*  
750 *Immunology*. 2002 Aug;2(8):569-.
- 751 49. Valadi H, Ekstrom K, Bossios A, Sjostrand M, Lee JJ, Lotvall JO. Exosome-mediated transfer of  
752 mRNAs and microRNAs is a novel mechanism of genetic exchange between cells. *Nature Cell*  
753 *Biology*. 2007 Jun;9(6):654-.
- 754 50. Bobrie A, Colombo M, Raposo G, Théry C. Exosome Secretion: Molecular Mechanisms and Roles in  
755 Immune Responses. *Traffic*. 2011;12(12):1659–68.
- 756 51. Raposo G, Nijman HW, Stoorvogel W, Liejendekker R, Harding CV, Melief CJ, et al. B lymphocytes  
757 secrete antigen-presenting vesicles. *J Exp Med*. 1996 Mar 1;183(3):1161–72.
- 758 52. Vlassov AV, Magdaleno S, Setterquist R, Conrad R. Exosomes: Current knowledge of their  
759 composition, biological functions, and diagnostic and therapeutic potentials. *Biochimica et*  
760 *Biophysica Acta (BBA) - General Subjects*. 2012 Jul 1;1820(7):940–8.
- 761 53. Ricciardi A, Bennuru S, Tariq S, Kaur S, Wu W, Elkahloun AG, et al. Extracellular vesicles released  
762 from the filarial parasite *Brugia malayi* downregulate the host mTOR pathway. *PLOS Neglected*  
763 *Tropical Diseases*. 2021 Jan 7;15(1):e0008884.
- 764 54. Gu HY, Marks ND, Winter AD, Weir W, Tzelos T, McNeilly TN, et al. Conservation of a microRNA  
765 cluster in parasitic nematodes and profiling of miRNAs in excretory-secretory products and  
766 microvesicles of *Haemonchus contortus*. *PLOS Neglected Tropical Diseases*. 2017 Nov  
767 16;11(11):e0006056.
- 768 55. Eichenberger RM, Ryan S, Jones L, Buitrago G, Polster R, Montes de Oca M, et al. Hookworm  
769 Secreted Extracellular Vesicles Interact With Host Cells and Prevent Inducible Colitis in Mice. *Front*  
770 *Immunol* [Internet]. 2018 [cited 2020 Jun 3];9. Available from:  
771 <https://www.frontiersin.org/articles/10.3389/fimmu.2018.00850/full>
- 772 56. Eichenberger RM, Talukder MH, Field MA, Wangchuk P, Giacomini P, Loukas A, et al.  
773 Characterization of *Trichuris muris* secreted proteins and extracellular vesicles provides new



- 774 insights into host–parasite communication. *Journal of Extracellular Vesicles*. 2018 Dec  
775 1;7(1):1428004.
- 776 57. Tzelos T, Matthews JB, Buck AH, Simbari F, Frew D, Inglis NF, et al. A preliminary proteomic  
777 characterisation of extracellular vesicles released by the ovine parasitic nematode, *Teladorsagia*  
778 *circumcincta*. *Veterinary Parasitology*. 2016 May 15;221:84–92.
- 779 58. Hansen EP, Fromm B, Andersen SD, Marcilla A, Andersen KL, Borup A, et al. Exploration of  
780 extracellular vesicles from *Ascaris suum* provides evidence of parasite–host cross talk. *Journal of*  
781 *Extracellular Vesicles*. 2019 Dec 1;8(1):1578116.
- 782 59. Tritten L, Tam M, Vargas M, Jardim A, Stevenson MM, Keiser J, et al. Excretory/secretory products  
783 from the gastrointestinal nematode *Trichuris muris*. *Experimental Parasitology*. 2017 Jul 1;178:30–  
784 6.
- 785 60. Shears RK, Bancroft AJ, Hughes GW, Grecis RK, Thornton DJ. Extracellular vesicles induce  
786 protective immunity against *Trichuris muris*. *Parasite Immunology*. 2018;40(7):e12536.
- 787 61. Hansen EP, Kringel H, Williams AR, Nejsum P. SECRETION OF RNA-CONTAINING EXTRACELLULAR  
788 VESICLES BY THE PORCINE WHIPWORM, *TRICHURIS SUIS*. *The Journal of Parasitology*.  
789 2015;101(3):336–40.
- 790 62. Kosanović M, Cvetković J, Gruden-Movsesijan A, Vasilev S, Svetlana M, Ilić N, et al. *Trichinella*  
791 *spiralis* muscle larvae release extracellular vesicles with immunomodulatory properties. *Parasite*  
792 *Immunology*. 2019;41(10):e12665.
- 793 63. Duque-Correa MA, Schreiber F, Rodgers FH, Goulding D, Forrest S, White R, et al. Development of  
794 caecaloids to study host–pathogen interactions: new insights into immunoregulatory functions of  
795 *Trichuris muris* extracellular vesicles in the caecum. *International Journal for Parasitology*. 2020  
796 Aug 1;50(9):707–18.
- 797 64. Barletta ABF, Silva MCLN, Sorgine MHF. Validation of *Aedes aegypti* Aag-2 cells as a model for  
798 insect immune studies. *Parasites & Vectors*. 2012 Jul 24;5(1):148.
- 799 65. Joshi BS, de Beer MA, Giepmans BNG, Zuhorn IS. Endocytosis of Extracellular Vesicles and Release  
800 of Their Cargo from Endosomes. *ACS Nano*. 2020 Apr 28;14(4):4444–55.
- 801 66. Wang LH, Rothberg KG, Anderson RG. Mis-assembly of clathrin lattices on endosomes reveals a  
802 regulatory switch for coated pit formation. *Journal of Cell Biology*. 1993 Dec 1;123(5):1107–17.
- 803 67. Vercauteren D, Vandenbroucke RE, Jones AT, Rejman J, Demeester J, De Smedt SC, et al. The Use  
804 of Inhibitors to Study Endocytic Pathways of Gene Carriers: Optimization and Pitfalls. *Molecular*  
805 *Therapy*. 2010 Mar 1;18(3):561–9.
- 806 68. Payne CK, Jones SA, Chen C, Zhuang X. Internalization and Trafficking of Cell Surface Proteoglycans  
807 and Proteoglycan-Binding Ligands. *Traffic*. 2007;8(4):389–401.
- 808 69. Winter F, Edaye S, Hüttenhofer A, Brunel C. *Anopheles gambiae* miRNAs as actors of defence  
809 reaction against *Plasmodium* invasion. *Nucleic Acids Research*. 2007 Nov 1;35(20):6953–62.

- 810 70. Campbell CL, Harrison T, Hess AM, Ebel GD. MicroRNA levels are modulated in *Aedes aegypti* after  
811 exposure to Dengue-2. *Insect Molecular Biology*. 2014;23(1):132–9.
- 812 71. Dedkhad W, Christensen BM, Bartholomay LC, Joshi D, Hempolchom C, Saeung A. Immune  
813 responses of *Aedes togoi*, *Anopheles paraliae* and *Anopheles lesteri* against nocturnally  
814 subperiodic *Brugia malayi* microfilariae during migration from the midgut to the site of  
815 development. *Parasites Vectors*. 2018 Dec;11(1):1–15.
- 816 72. Ramachandran CP. Biological Aspects in the Transmission of *Brugia Malayi* by *Aedes Aegypti* in the  
817 Laboratory1. *Journal of Medical Entomology*. 1966 Dec 1;3(3–4):239–52.
- 818 73. Albuquerque CM, Cavalcanti VM, Melo MAV, Verçosa P, Regis LN, Hurd H. Bloodmeal microfilariae  
819 density and the uptake and establishment of *Wuchereria bancrofti* infections in *Culex*  
820 *quinquefasciatus* and *Aedes aegypti*. *Mem Inst Oswaldo Cruz*. 1999 Sep;94:591–6.
- 821 74. Childs LM, Cai FY, Kakani EG, Mitchell SN, Paton D, Gabrieli P, et al. Disrupting Mosquito  
822 Reproduction and Parasite Development for Malaria Control. *PLOS Pathogens*. 2016 Dec  
823 15;12(12):e1006060.
- 824 75. Werling K, Shaw WR, Itoe MA, Westervelt KA, Marcenac P, Paton DG, et al. Steroid Hormone  
825 Function Controls Non-competitive Plasmodium Development in *Anopheles*. *Cell*. 2019 Apr  
826 4;177(2):315-325.e14.
- 827 76. O’Neal AJ, Butler LR, Rolandelli A, Gilk SD, Pedra JH. Lipid hijacking: A unifying theme in vector-  
828 borne diseases. Soldati-Favre D, editor. *eLife*. 2020 Oct 29;9:e61675.
- 829 77. Jin Z, Mendu SK, Birnir B. GABA is an effective immunomodulatory molecule. *Amino Acids*. 2013  
830 Jul;45(1):87–94.
- 831 78. Jones AK, Bera AN, Lees K, Sattelle DB. The cys-loop ligand-gated ion channel gene superfamily of  
832 the parasitoid wasp, *Nasonia vitripennis*. *Heredity (Edinb)*. 2010 Mar;104(3):247–59.
- 833 79. Delpuech J-M, Frey F, Carton Y. Action of insecticides on the cellular immune reaction of  
834 *Drosophila melanogaster* against the parasitoid *Leptopilina boulardi*. *Environmental Toxicology*  
835 *and Chemistry*. 1996;15(12):2267–71.
- 836 80. Balasubramanian N, Toubarro D, Simões N. Biochemical study and in vitro insect immune  
837 suppression by a trypsin-like secreted protease from the nematode *Steinernema carpocapsae*.  
838 *Parasite Immunology*. 2010;32(3):165–75.
- 839 81. Balasubramanian N, Hao Y-J, Toubarro D, Nascimento G, Simões N. Purification, biochemical and  
840 molecular analysis of a chymotrypsin protease with prophenoloxidase suppression activity from  
841 the entomopathogenic nematode *Steinernema carpocapsae*. *International Journal for*  
842 *Parasitology*. 2009 Jul 15;39(9):975–84.
- 843 82. Song C, Gallup JM, Day TA, Bartholomay LC, Kimber MJ. Development of an In Vivo RNAi Protocol  
844 to Investigate Gene Function in the Filarial Nematode, *Brugia malayi*. *PLOS Pathogens*. 2010 Dec  
845 23;6(12):e1001239.

- 846 83. Mayhew GF, Bartholomay LC, Kou H-Y, Rocheleau TA, Fuchs JF, Aliota MT, et al. Construction and  
847 characterization of an expressed sequenced tag library for the mosquito vector *Armigeres*  
848 *subalbatus*. *BMC Genomics*. 2007 Dec 18;8(1):462.
- 849 84. Choi Y-J, Aliota MT, Mayhew GF, Erickson SM, Christensen BM. Dual RNA-seq of Parasite and Host  
850 Reveals Gene Expression Dynamics during Filarial Worm–Mosquito Interactions. *PLOS Neglected*  
851 *Tropical Diseases*. 2014 May 22;8(5):e2905.
- 852 85. Juneja P, Ariani CV, Ho YS, Akorli J, Palmer WJ, Pain A, et al. Exome and Transcriptome Sequencing  
853 of *Aedes aegypti* Identifies a Locus That Confers Resistance to *Brugia malayi* and Alters the  
854 Immune Response. *PLOS Pathogens*. 2015 Mar 27;11(3):e1004765.
- 855 86. Humphreys NE, Xu D, Hepworth MR, Liew FY, Grencis RK. IL-33, a Potent Inducer of Adaptive  
856 Immunity to Intestinal Nematodes. *The Journal of Immunology*. 2008 Feb 15;180(4):2443–9.
- 857 87. Bolger AM, Lohse M, Usadel B. Trimmomatic: a flexible trimmer for Illumina sequence data.  
858 *Bioinformatics*. 2014 Aug 1;30(15):2114–20.
- 859 88. Kim D, Paggi JM, Park C, Bennett C, Salzberg SL. Graph-based genome alignment and genotyping  
860 with HISAT2 and HISAT-genotype. *Nat Biotechnol*. 2019 Aug;37(8):907–15.
- 861 89. Pertea M, Pertea GM, Antonescu CM, Chang T-C, Mendell JT, Salzberg SL. StringTie enables  
862 improved reconstruction of a transcriptome from RNA-seq reads. *Nat Biotechnol*. 2015  
863 Mar;33(3):290–5.
- 864 90. Howe KL, Bolt BJ, Shafie M, Kersey P, Berriman M. WormBase ParaSite – a comprehensive resource  
865 for helminth genomics. *Molecular and Biochemical Parasitology*. 2017 Jul 1;215:2–10.
- 866 91. Howe KL, Bolt BJ, Cain S, Chan J, Chen WJ, Davis P, et al. WormBase 2016: expanding to enable  
867 helminth genomic research. *Nucleic Acids Research*. 2016 Jan 4;44(D1):D774–80.
- 868 92. Giraldo-Calderón GI, Emrich SJ, MacCallum RM, Maslen G, Dialynas E, Topalis P, et al. VectorBase:  
869 an updated bioinformatics resource for invertebrate vectors and other organisms related with  
870 human diseases. *Nucleic Acids Res*. 2015 Jan 28;43(Database issue):D707–13.
- 871 93. Di Tommaso P, Chatzou M, Floden EW, Barja PP, Palumbo E, Notredame C. Nextflow enables  
872 reproducible computational workflows. *Nat Biotechnol*. 2017 Apr;35(4):316–9.
- 873 94. Love MI, Huber W, Anders S. Moderated estimation of fold change and dispersion for RNA-seq  
874 data with DESeq2. *Genome Biology*. 2014 Dec 5;15(12):550.
- 875 95. Alexa A, Rahnenfuhrer J. topGO: Enrichment Analysis for Gene Ontology. R Package; 2021.
- 876 96. Kozomara A, Griffiths-Jones S. miRBase: annotating high confidence microRNAs using deep  
877 sequencing data. *Nucleic Acids Research*. 2014 Jan 1;42(D1):D68–73.
- 878 97. Kozomara A, Griffiths-Jones S. miRBase: integrating microRNA annotation and deep-sequencing  
879 data. *Nucleic Acids Research*. 2011 Jan 1;39(suppl\_1):D152–7.

- 880 98. Kozomara A, Birgaoanu M, Griffiths-Jones S. miRBase: from microRNA sequences to function.  
881 Nucleic Acids Research. 2019 Jan 8;47(D1):D155–62.
- 882 99. Griffiths-Jones S, Saini HK, van Dongen S, Enright AJ. miRBase: tools for microRNA genomics.  
883 Nucleic Acids Research. 2008 Jan 1;36(suppl\_1):D154–8.
- 884 100. Griffiths-Jones S, Grocock RJ, van Dongen S, Bateman A, Enright AJ. miRBase: microRNA sequences,  
885 targets and gene nomenclature. Nucleic Acids Research. 2006 Jan 1;34(suppl\_1):D140–4.
- 886 101. Griffiths-Jones S. The microRNA Registry. Nucleic Acids Research. 2004 Jan 1;32(suppl\_1):D109–11.
- 887 102. Camacho C, Coulouris G, Avagyan V, Ma N, Papadopoulos J, Bealer K, et al. BLAST+: architecture  
888 and applications. BMC Bioinformatics. 2009 Dec 15;10(1):421.
- 889 103. Lorenz R, Bernhart SH, Höner zu Siederdisen C, Tafer H, Flamm C, Stadler PF, et al. ViennaRNA  
890 Package 2.0. Algorithms for Molecular Biology. 2011 Nov 24;6(1):26.
- 891 104. Calvin H. Jan RCF. Formation, Regulation and Evolution of *Caenorhabditis elegans* 3'UTRs. Nature.  
892 2011 Jan 6;469(7328):97.
- 893 105. Nam J-W, Rissland OS, Koppstein D, Abreu-Goodger C, Jan CH, Agarwal V, et al. Global analyses of  
894 the effect of different cellular contexts on microRNA targeting. Mol Cell. 2014 Mar 20;53(6):1031–  
895 43.
- 896 106. Lewis BP, Burge CB, Bartel DP. Conserved Seed Pairing, Often Flanked by Adenosines, Indicates  
897 that Thousands of Human Genes are MicroRNA Targets. Cell. 2005 Jan 14;120(1):15–20.
- 898 107. Enright AJ, John B, Gaul U, Tuschl T, Sander C, Marks DS. MicroRNA targets in *Drosophila*. Genome  
899 Biology. 2003 Dec 12;5(1):R1.
- 900 108. Kwon H, Hall DR, Smith RC. Prostaglandin E2 Signaling Mediates Oenocytoid Immune Cell Function  
901 and Lysis, Limiting Bacteria and Plasmodium Oocyst Survival in *Anopheles gambiae*. Frontiers in  
902 Immunology. 2021;12:3303.
- 903
- 904

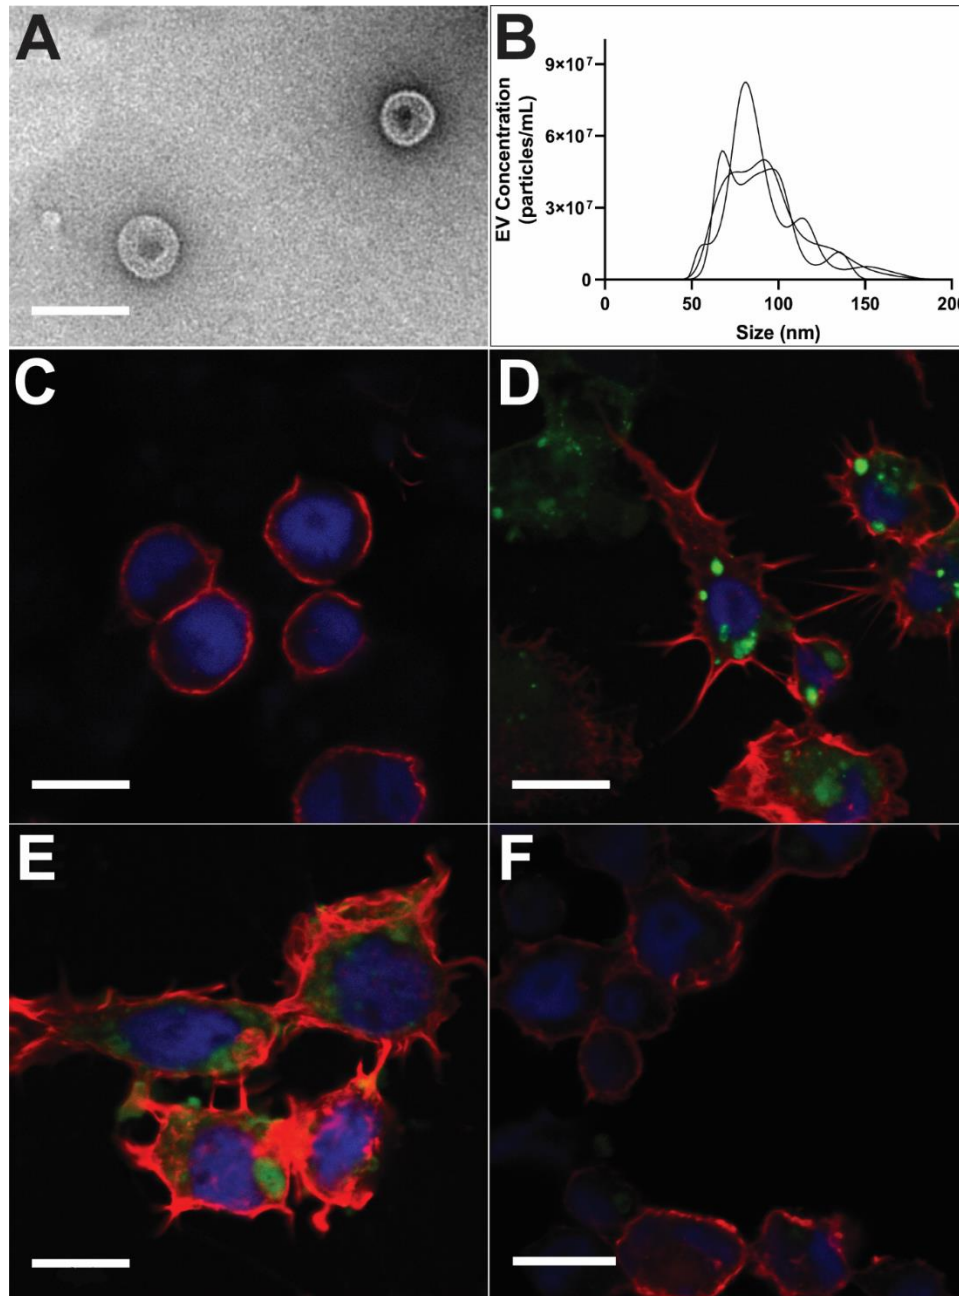

905

906 **Figure 1. *B. malayi* mf derived EVs are internalized by Aag2 cells**

907 Isolation of *B. malayi* mf EVs was confirmed by TEM (A) and size profile was further validated  
908 with nanoparticle tracking analysis (B). PKH67 stained *B. malayi* mf EVs were incubated with  
909 Aag2 cells for 24 hours. Cells were stained with Alexa Fluor 647 Phalloidin and DAPI and  
910 imaged with a Leica SP5 X MP confocal/multiphoton microscope system. 51% of cells  
911 incubated with PKH67 stained EVs showed internalization indicated by the green fluorescence  
912 inside the cell (D) as compared to control cells (C). Cells treated with endocytosis inhibitors  
913 chlorpromazine (E) showed no endocytosis of stained EVs while cells treated with nystatin (F)  
914 showed diffuse uptake of EVs throughout the cytoplasm. Scale bar (A) = 150 nm. Scale bar (C-  
915 F) = 10  $\mu$ M.

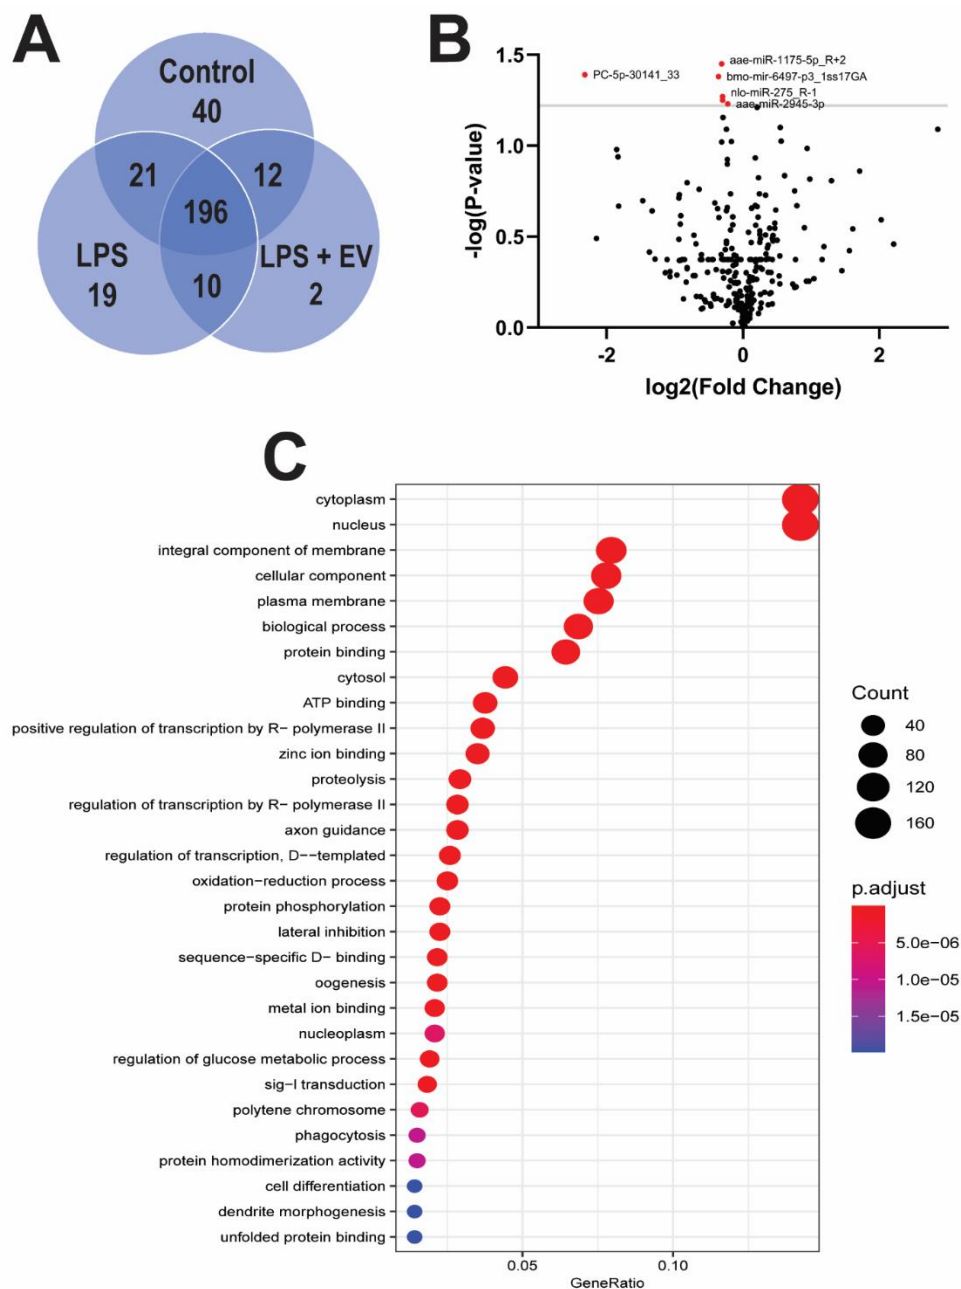

937

938 **Figure 2. EV Treatment suppresses miRNA expression with Immune Related Targets**

939 miRNA-seq analysis was performed on control, LPS and LPS + EV treated Aag2 cells. All three  
 940 treatment groups shared 196 miRNAs while 40, 19 and two miRNAs were unique to control,  
 941 LPS only and LPS + EV treatment groups respectively (A). Six significantly, differentially  
 942 expressed miRNAs were identified between the LPS and LPS + EV treatment groups (B).  
 943 Predicted targets were identified for five out of the six significantly downregulated miRNAs.  
 944 Gene ontology (GO) analysis of these predicted gene targets identified their role in various  
 945 physiological processes including proteolysis, signal transduction and regulation of transcription  
 946 (C).

| <b>miRNA</b>   | <b>Function of Predicted Target</b>  |
|----------------|--------------------------------------|
| aae-mir-1175   | MAPK Signaling Pathway               |
|                | Longevity Regulating Pathway         |
|                | Phosatidylinositol Signaling Pathway |
|                | NOD-like Receptor Signaling Pathway  |
|                | Wnt Signaling Pathway                |
|                | Notch Signaling Pathway              |
|                | TGF $\beta$ Signaling Pathway        |
|                | FoxO Signaling Pathway               |
|                | Toll and Imd Signaling Pathway       |
|                |                                      |
| aae-mir-2945   | Phosatidylinositol Signaling Pathway |
|                | MAPK Signaling Pathway               |
|                | Wnt Signaling Pathway                |
|                | Toll and Imd Signaling Pathway       |
|                | Insulin Signaling Pathway            |
|                | Neurotrophin Signaling Pathway       |
|                | TGF $\beta$ Signaling Pathway        |
|                | FoxO Signaling Pathway               |
|                | Phosatidylinositol Signaling Pathway |
|                | mTOR Signaling Pathway               |
|                | Longevity Regulating Pathway         |
|                | Ras Signaling Pathway                |
|                |                                      |
|                |                                      |
| bmo-mir-6497   | Toll and Imd Signaling Pathway       |
|                | MAPK Signaling Pathway               |
|                | Notch Signaling Pathway              |
|                | Longevity Regulating Pathway         |
|                | mTOR Signaling Pathway               |
|                | Wnt Signaling Pathway                |
|                | FoxO Signaling Pathway               |
|                | p53 Signaling Pathway                |
|                | Hedgehog Signaling Pathway           |
|                | Rap1 Signaling Pathway               |
|                | Insulin Signaling Pathway            |
|                | Neurotrophin Signaling Pathway       |
|                |                                      |
|                |                                      |
| PC-5p-30141_33 | Hedgehog Signaling Pathway           |
|                | MAPK Signaling Pathway               |
|                | TGF $\beta$ Signaling Pathway        |
|                | mTOR Signaling Pathway               |

947 **Table 1. KEGG Analysis of downregulated miRNA predicted targets**

948 KEGG analysis of the predicted target genes of the significantly, downregulated miRNAs  
 949 revealed an enrichment of immune signaling pathways, including common insect immune  
 950 signaling pathways such as Toll/IMD, MAPK, TGF $\beta$  and insulin signaling.

951

952

953

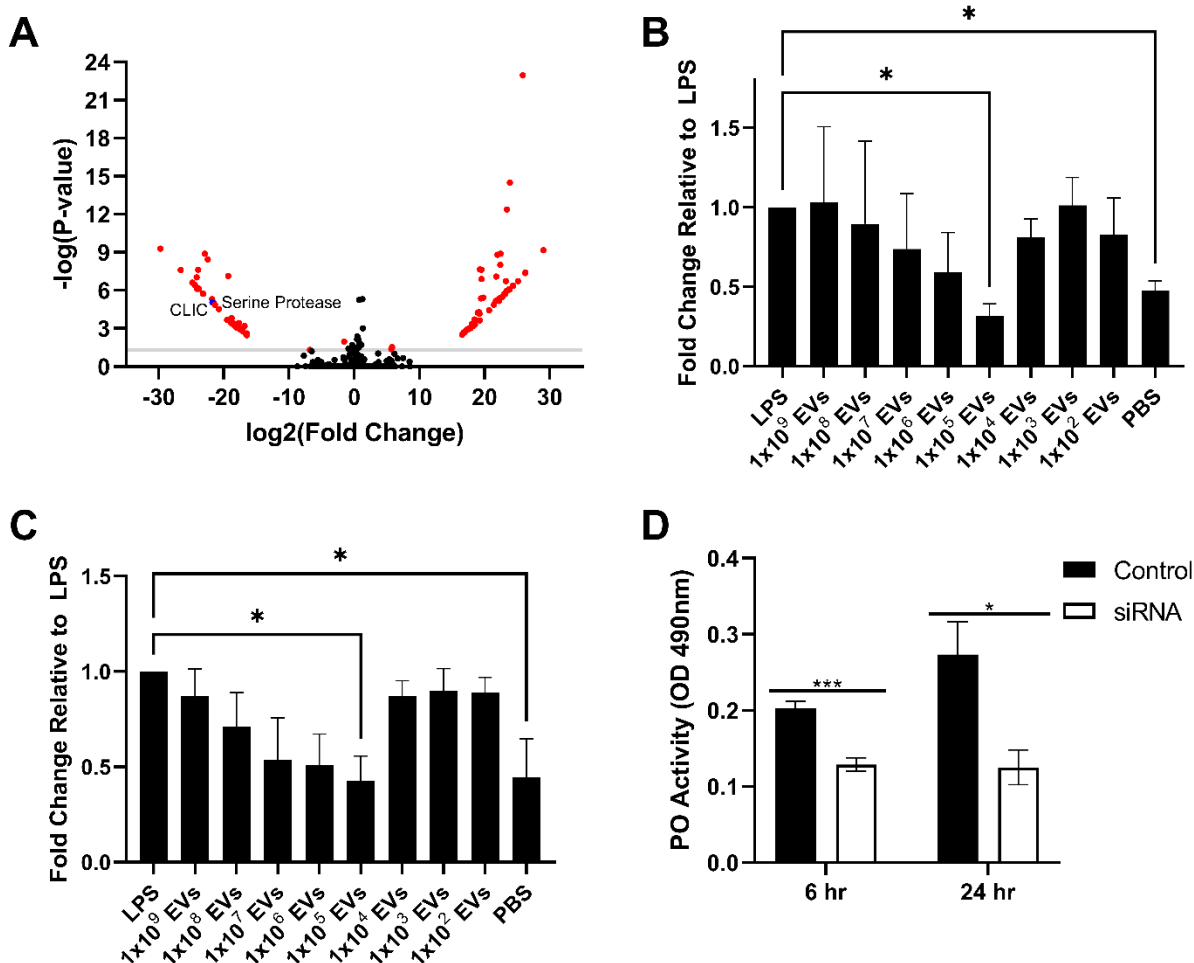

954 **Figure 3. EVs released by *B. malayi* microfilariae downregulate predicted immune related**  
 955 **genes *in vitro***

956 Multiple genes were differentially expressed between LPS and LPS + EV treatment groups (A).  
 957 Two moderately annotated and significantly downregulated genes were chosen for further *in*  
 958 *vitro* validation by RT-qPCR. Both the CLIC subunit gene (B) and the serine protease gene (C)  
 959 were significantly downregulated when treated with  $1 \times 10^5$  *B. malayi* mf EVs as compared to  
 960 control. RNAi knockdown of the serine protease gene in Aag2 cells inhibited phenoloxidase  
 961 activity as compared to control at both 6 and 24 hrs post treatment (D) indicating that the serine  
 962 protease gene is involved in the PO pathway. N = 3 (minimum). Mean  $\pm$  SEM. \* P < 0.05, \*\*\*P  
 963 < 0.001.

964

965

966

967



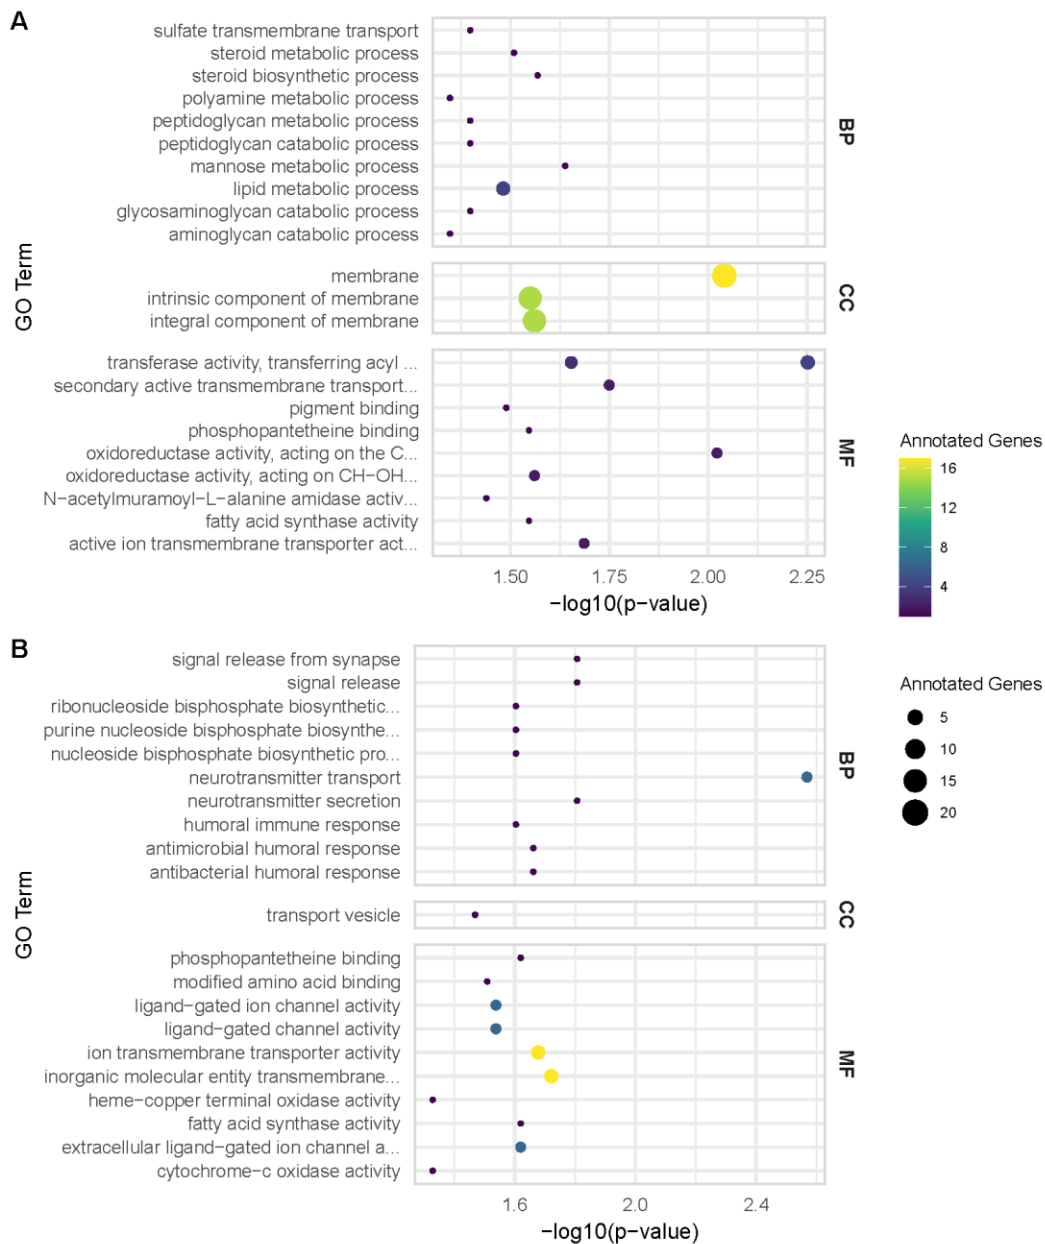

968

969 **Figure 4. Downregulated mRNAs are involved in signaling and immune responses**

970 GO analysis on significantly upregulated genes (A) shows that these genes are enriched in GO  
 971 terms associated with metabolic processes and oxidoreductase activity while downregulated  
 972 genes (B) are enriched for GO terms associated with signaling and immune responses.

973

974

975

976

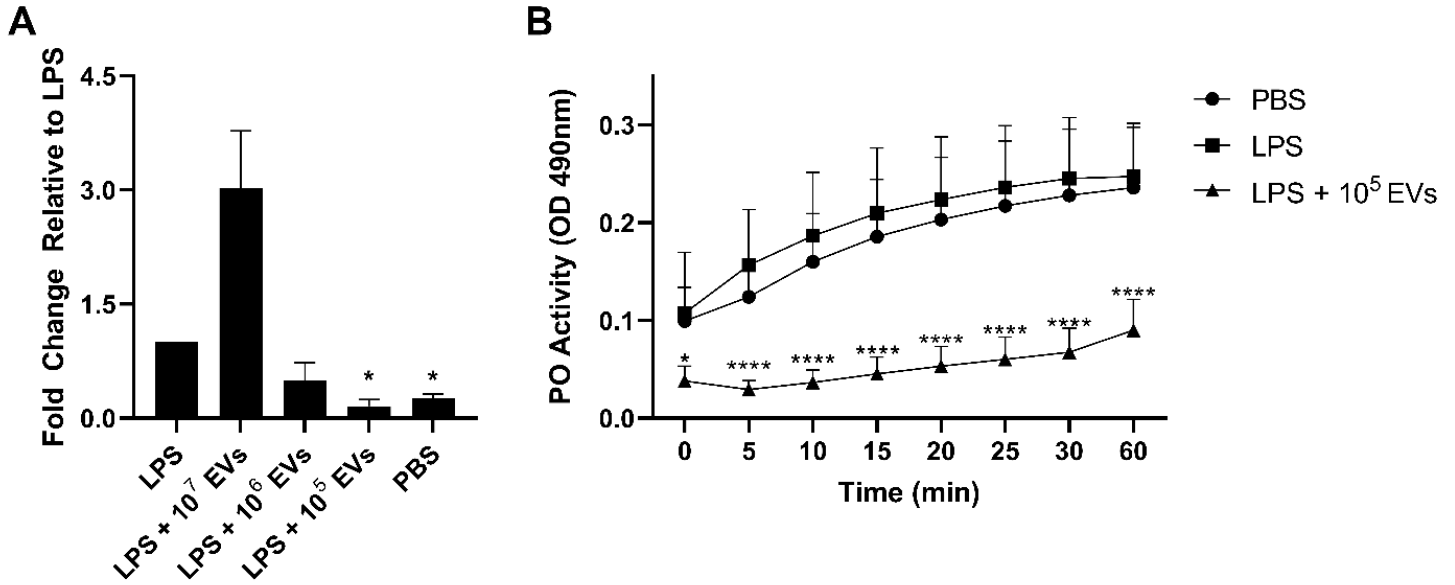

977 **Figure 5. Phenoloxidase activity is inhibited by EV treatment**

978 Validation of the downregulation of the serine protease gene *in vivo* was investigated by  
979 injection of adult female mosquitoes with serial dilutions of *B. malayi* mf EVs after initial  
980 treatment with LPS. 1x10<sup>5</sup> EVs significantly downregulated the serine protease gene as  
981 compared to LPS only (A). Hemolymph of injected mosquitoes was collected to test for  
982 phenoloxidase activity. Treatment of adult female mosquitoes with 1x10<sup>5</sup> mf EVs inhibited PO  
983 activity as compared to LPS only at all time points (B). N = 3 (minimum). Mean ± SEM. \*P <  
984 0.05, \*\*\*\*P < 0.0001.

985

986

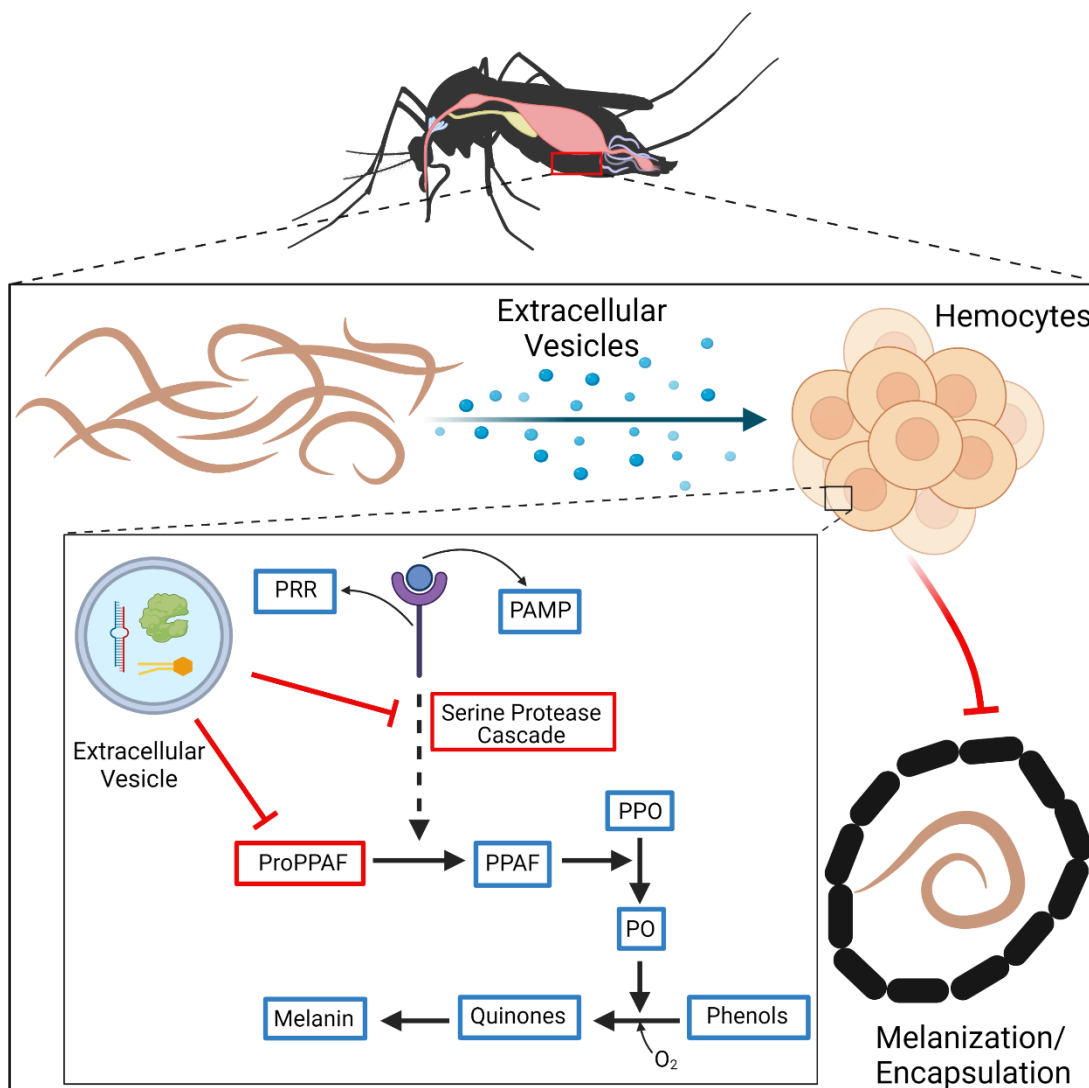

987

988

989 **Figure 6. *B. malayi* microfilariae release EVs that interfere with the PO cascade and**  
990 **melanization**

991 Melanotic encapsulation is a common insect defense mechanism against parasites. Upon  
992 recognition of a parasite, hemocytes aggregate forming a multicellular layer that deposits a  
993 melanin-enriched capsule around the invading parasite. Melanin production is controlled by the  
994 phenoloxidase (PO) cascade, which through a series of interdependent reactions, leads to the  
995 activation of PO that oxidizes phenols to quinones, which are further polymerized to melanin.  
996 Death of the parasite is believed to be due to nutrient deprivation, asphyxiation, or through the  
997 production of toxins such as quinones and other reactive oxygen species produced during  
998 melanin production. *B. malayi* microfilariae-derived extracellular vesicles downregulate a serine  
999 protease that functions either at the serine protease cascade or as a PPAF, either way interfering  
1000 with the production of PO and thus inhibiting melanization of invading parasites.
